# Supplementary material for: Serum proteins differentially expressed in early- and late-onset preeclampsia assessed using iTRAQ proteomics and bioinformatics analyses
Source: PeerJ. 2020 Sep 1;8:e9753. doi: 10.7717/peerj.9753 (PMC7473043; doi:10.7717/peerj.9753)
Supplement: Supplemental Information 2 [file peerj-08-9753-s002.xlsx]

## Sheet: Sheet1
														late onset preeclampsia				control
Accession	gene name	Description	Coverage [%]	# Peptides	# PSMs	# Unique Peptides	# Protein Groups	# AAs	MW [kDa]	calc. pI	Score Sequest HT: Sequest HT	# Peptides (by Search Engine): Sequest HT	# Razor Peptides	WH	LFY	LX	DQQ	SLJ	SYP	WLL	WD	Group_control.average	Group_control.call.percent	Group_eclampsia.average	Group_eclampsia.call.percent	Group_eclampsia.vs.Group_control.FC	pvalue
Q9HDC9	APMAP	Adipocyte plasma membrane-associated protein OS=Homo sapiens OX=9606 GN=APMAP PE=1 SV=2	12	5	15	5	1	416	46.5	6.16	33.97	5	0	100145	1.03224e+07	4.45122e+07	3.03368e+06	6.76187e+06	515571	482107	595173	2.08868e+06	1	1.44921e+07	1	6.9384	0.276058
X6R8F3	LCN2	Neutrophil gelatinase-associated lipocalin OS=Homo sapiens OX=9606 GN=LCN2 PE=1 SV=1	16	2	4	2	1	200	22.8	8.5	12.41	2	0	133841	NA	NA	NA	5.54157e+06	3.14976e+06	1.88504e+06	NA	3.52546e+06	0.75	133841	0.25	0.0379641	NA
Q13228	SELENBP1	Methanethiol oxidase OS=Homo sapiens OX=9606 GN=SELENBP1 PE=1 SV=2	2	1	1	1	1	472	52.4	6.37	0	1	0	138767	395987	NA	NA	452447	157517	81805.7	NA	230590	0.75	267377	0.5	1.15953	0.846648
A0A140VK27	#N/A	Leukotriene A(4) hydrolase OS=Homo sapiens OX=9606 PE=2 SV=1	2	1	1	1	1	611	69.2	6.18	0	1	0	151983	NA	NA	NA	344877	697842	NA	NA	521360	0.5	151983	0.25	0.291513	NA
V9HW92	HEL-S-112	Epididymis secretory protein Li 112 OS=Homo sapiens OX=9606 GN=HEL-S-112 PE=2 SV=1	6	2	5	2	1	329	36	7.02	10.32	2	0	158507	3.79388e+06	7.89281e+06	NA	7.28238e+06	2.83824e+06	NA	NA	5.06031e+06	0.5	3.9484e+06	0.75	0.780268	0.760143
Q8WWZ8	OIT3	Oncoprotein-induced transcript 3 protein OS=Homo sapiens OX=9606 GN=OIT3 PE=1 SV=2	2	1	2	1	1	545	60	5.58	1.66	1	0	165273	284844	NA	221014	1.03942e+06	608715	513051	NA	720395	0.75	223710	0.75	0.310538	0.0399186
Q15430	F5	Coagulation factor V (Fragment) OS=Homo sapiens OX=9606 GN=F5 PE=2 SV=1	4	1	1	1	1	236	26.1	5.48	2.27	1	0	199673	1.56638e+06	NA	224544	25744752	NA	1.2101e+06	4.08242e+06	1.03458e+07	0.75	663533	0.75	0.0641357	0.280044
P13639	EEF2	Elongation factor 2 OS=Homo sapiens OX=9606 GN=EEF2 PE=1 SV=4	4	2	4	2	1	858	95.3	6.83	2.77	2	0	269481	NA	NA	263800	183084	NA	NA	NA	183084	0.25	266640	0.5	1.45638	NA
Q6ZNX5	#N/A	cDNA FLJ26936 fis, clone RCT06808 OS=Homo sapiens OX=9606 PE=2 SV=1	5	1	3	1	1	165	17.7	7.52	1.71	1	0	285646	344794	NA	NA	184664	238738	540007	NA	321136	0.75	315220	0.5	0.981577	0.969893
O15394	NCAM2	Neural cell adhesion molecule 2 OS=Homo sapiens OX=9606 GN=NCAM2 PE=1 SV=2	2	1	4	1	1	837	93	5.6	4.2	1	0	301126	787259	526933	787024	1.50877e+06	1.10298e+06	2.1807e+06	590509	1.34574e+06	1	600585	1	0.446286	0.0810072
Q8IWV2	CNTN4	Contactin-4 OS=Homo sapiens OX=9606 GN=CNTN4 PE=1 SV=1	1	1	1	1	1	1026	113.4	7.47	0	1	0	337835	NA	NA	NA	570817	571003	446956	NA	529592	0.75	337835	0.25	0.637915	NA
B2R9V7	#N/A	Superoxide dismutase [Cu-Zn] OS=Homo sapiens OX=9606 PE=2 SV=1	11	2	7	2	1	240	25.9	6.79	16.04	2	0	355548	552145	895520	542533	894223	1.80368e+06	1.90718e+06	721525	1.33165e+06	1	586437	1	0.440383	0.0618519
A0A024RDB8	HPSE	Heparanase, isoform CRA_a OS=Homo sapiens OX=9606 GN=HPSE PE=4 SV=1	2	1	4	1	1	543	61.1	9.29	3.89	1	0	366687	882935	1.30278e+06	NA	1.33082e+06	NA	608301	169215	702779	0.75	784520	1	1.11631	0.834378
D3DR24	EXT2	Exostoses (Multiple) 2, isoform CRA_a OS=Homo sapiens OX=9606 GN=EXT2 PE=4 SV=1	2	1	4	1	1	731	83.7	6.16	2.31	1	0	380341	393494	300527	211874	404237	206166	476968	NA	362457	0.75	321559	1	0.887164	0.646689
V9HW98	HEL2	Epididymis luminal protein 2 OS=Homo sapiens OX=9606 GN=HEL2 PE=1 SV=1	12	2	4	2	1	255	29.2	4.74	4.33	2	0	397428	337500	618874	291031	NA	NA	NA	400677	400677	0.25	411208	1	1.02628	NA
V9HVY3	HEL-S-269	Protein disulfide-isomerase OS=Homo sapiens OX=9606 GN=HEL-S-269 PE=2 SV=1	4	2	10	1	1	505	56.7	6.35	18.99	2	0	402411	597907	1.22398e+06	184578	809131	543549	603276	NA	651985	0.75	602220	1	0.923671	0.862616
A8K2T7	#N/A	Receptor protein-tyrosine kinase OS=Homo sapiens OX=9606 PE=2 SV=1	1	1	1	1	1	1210	134.1	6.7	0	1	0	423794	377965	NA	NA	647615	NA	663631	NA	655623	0.5	400880	0.5	0.611449	0.00895752
A0A1S5UZ07	TLN1	Talin-1 OS=Homo sapiens OX=9606 GN=TLN1 PE=2 SV=1	2	5	10	5	1	2558	271.3	6.11	19.59	5	0	426546	1.12525e+07	9.60548e+06	307018	7.4522e+06	1.66919e+06	408467	NA	3.17662e+06	0.75	5.39788e+06	1	1.69925	0.594237
A0A0G2JK05	LY6G6F-LY6G6D	Uncharacterized protein OS=Homo sapiens OX=9606 PE=4 SV=1	7	2	3	2	1	382	40.9	7.81	0	2	0	491474	3.53569e+06	NA	NA	1.68932e+06	NA	443745	NA	1.06653e+06	0.5	2.01358e+06	0.5	1.88797	0.622873
Q4LE36	ACLY	ACLY variant protein (Fragment) OS=Homo sapiens OX=9606 GN=ACLY variant protein PE=2 SV=1	2	1	1	1	1	1137	124.5	8.03	2.04	1	0	522117	387745	318023	250735	NA	NA	74921.1	NA	74921.1	0.25	369655	1	4.93392	NA
Q9UBX1	CTSF	Cathepsin F OS=Homo sapiens OX=9606 GN=CTSF PE=1 SV=1	2	1	2	1	1	484	53.3	8.22	0	1	0	527231	744216	1.22239e+06	480561	NA	210961	540129	331077	360722	0.75	743600	1	2.06142	0.136818
P09172	DBH	Dopamine beta-hydroxylase OS=Homo sapiens OX=9606 GN=DBH PE=1 SV=3	12	7	25	7	1	617	69	6.42	50.93	7	0	538131	1.3498e+07	8.59685e+06	2.86369e+06	3.84703e+07	1.55569e+07	1.81462e+07	1.06743e+06	1.83102e+07	1	6.37417e+06	1	0.348122	0.19731
A0A024R8S5	P4HB	Protein disulfide-isomerase OS=Homo sapiens OX=9606 GN=P4HB PE=2 SV=1	5	2	6	2	1	508	57.1	4.87	11.2	2	0	557000	771656	827624	482215	971959	919017	865565	197230	738443	1	659624	1	0.893263	0.706845
Q9Y279	VSIG4	V-set and immunoglobulin domain-containing protein 4 OS=Homo sapiens OX=9606 GN=VSIG4 PE=1 SV=1	3	1	3	1	1	399	44	6.35	0	1	0	561201	578303	651717	417606	865571	584542	631782	190142	568009	1	552207	1	0.972179	0.918694
P23284	PPIB	Peptidyl-prolyl cis-trans isomerase B OS=Homo sapiens OX=9606 GN=PPIB PE=1 SV=2	6	1	1	1	1	216	23.7	9.41	0	1	0	598055	NA	1.96472e+06	NA	NA	708265	NA	NA	708265	0.25	1.28139e+06	0.5	1.80919	NA
P40925	MDH1	Malate dehydrogenase, cytoplasmic OS=Homo sapiens OX=9606 GN=MDH1 PE=1 SV=4	4	1	6	1	1	334	36.4	7.36	3.41	1	0	607909	684930	NA	NA	1.04994e+06	810914	502212	80057.6	610780	1	646419	0.5	1.05835	0.915381
Q0ZCI6	#N/A	Immunglobulin heavy chain variable region (Fragment) OS=Homo sapiens OX=9606 PE=4 SV=1	18	2	6	1	1	122	13.6	8.43	19.69	2	0	639760	NA	5.9928e+06	5.38496e+06	NA	NA	NA	7.6595e+06	7.6595e+06	0.25	4.00584e+06	0.75	0.52299	NA
Q92859	NEO1	Neogenin OS=Homo sapiens OX=9606 GN=NEO1 PE=1 SV=2	1	1	1	1	1	1461	159.9	6.54	1.96	1	0	675160	NA	993616	NA	NA	NA	567368	NA	567368	0.25	834388	0.5	1.47063	NA
Q14213	EBI3	Interleukin-27 subunit beta OS=Homo sapiens OX=9606 GN=EBI3 PE=1 SV=2	5	1	7	1	1	229	25.4	9.25	9.55	1	0	768658	2.23744e+06	1.92205e+06	667469	631691	1.0613e+06	1.17057e+06	191026	763648	1	1.3989e+06	1	1.83187	0.214075
A4D2D2	PCOLCE	Procollagen C-endopeptidase enhancer OS=Homo sapiens OX=9606 GN=PCOLCE PE=4 SV=1	4	1	7	1	1	449	47.9	7.43	13.49	1	0	775681	980630	NA	NA	1.19592e+06	720484	722289	NA	879564	0.75	878155	0.5	0.998398	0.99525
Q9Y6Z7	COLEC10	Collectin-10 OS=Homo sapiens OX=9606 GN=COLEC10 PE=1 SV=2	9	2	8	2	1	277	30.7	7.33	12.4	2	0	878629	1.64548e+06	8.80195e+06	3.63696e+06	3.13527e+06	1.22045e+06	1.29674e+06	1.03188e+06	1.67108e+06	1	3.74075e+06	1	2.23852	0.306213
B3KWB5	#N/A	cDNA FLJ42722 fis, clone BRAMY4000277, highly similar to Alpha-1B-glycoprotein OS=Homo sapiens OX=9606 PE=2 SV=1	19	7	101	1	1	345	37	5.62	199.53	7	0	983622	1.04355e+06	1.05932e+06	1.17464e+06	2.60565e+06	1.83103e+06	1.83682e+06	446821	1.68008e+06	1	1.06528e+06	1	0.634068	0.222033
P24043	LAMA2	Laminin subunit alpha-2 OS=Homo sapiens OX=9606 GN=LAMA2 PE=1 SV=4	1	2	4	2	1	3122	343.7	6.4	6.24	2	0	1.00173e+06	589575	NA	NA	NA	857869	620295	NA	739082	0.5	795654	0.5	1.07654	0.834155
A8K061	#N/A	cDNA FLJ77880, highly similar to Homo sapiens angiopoietin-like 3, mRNA OS=Homo sapiens OX=9606 PE=2 SV=1	4	2	3	2	1	460	53.6	6.6	5.57	2	0	1.06571e+06	2.77099e+06	1.84064e+06	835886	1.06203e+06	954342	1.88414e+06	1.65139e+06	1.38798e+06	1	1.62831e+06	1	1.17315	0.64257
Q8TER0	SNED1	Sushi, nidogen and EGF-like domain-containing protein 1 OS=Homo sapiens OX=9606 GN=SNED1 PE=2 SV=2	1	1	3	1	1	1413	152.1	6.98	4.27	1	0	1.09862e+06	771079	260471	226755	1.16053e+06	636311	1.1111e+06	NA	969313	0.75	589230	1	0.607884	0.240828
D3DQ70	SERBP1	SERPINE1 mRNA binding protein 1, isoform CRA_d OS=Homo sapiens OX=9606 GN=SERBP1 PE=4 SV=1	3	1	3	1	1	465	50.9	9.33	2.3	1	0	1.24716e+06	NA	753665	383940	NA	NA	NA	214501	214501	0.25	794922	0.75	3.70591	NA
P40189	IL6ST	Interleukin-6 receptor subunit beta OS=Homo sapiens OX=9606 GN=IL6ST PE=1 SV=2	2	2	4	2	1	918	103.5	5.95	3.52	2	0	1.25098e+06	NA	894425	1.04177e+06	NA	2.06912e+06	NA	2.46485e+06	2.26699e+06	0.5	1.06239e+06	0.75	0.468636	0.00903954
A0A024R0P8	TGFB1	Transforming growth factor beta OS=Homo sapiens OX=9606 GN=TGFB1 PE=3 SV=1	6	2	4	2	1	390	44.3	8.53	8.94	2	0	1.27751e+06	5.62711e+06	4.48466e+06	1.82906e+06	NA	766717	NA	2.5147e+06	1.64071e+06	0.5	3.30458e+06	1	2.01412	0.371495
Q12860	CNTN1	Contactin-1 OS=Homo sapiens OX=9606 GN=CNTN1 PE=1 SV=1	3	2	7	2	1	1018	113.2	5.9	13.64	2	0	1.28167e+06	1.05174e+06	730593	1.35139e+06	2939556	2.87356e+06	3.41948e+06	NA	3.07753e+06	0.75	1.10385e+06	1	0.35868	0.000283149
Q86TV4	#N/A	Full-length cDNA clone CS0DI085YI08 of Placenta of Homo sapiens (human) (Fragment) OS=Homo sapiens OX=9606 PE=2 SV=1	2	1	4	1	1	545	60	5.07	6.9	1	0	1.32405e+06	6.38888e+06	2.51392e+06	1.07248e+06	1.13083e+06	1.58487e+06	2.22816e+06	316632	1.31512e+06	1	2.82483e+06	1	2.14796	0.287235
P60174	TPI1	Triosephosphate isomerase OS=Homo sapiens OX=9606 GN=TPI1 PE=1 SV=3	15	2	4	2	1	286	30.8	5.92	4.52	2	0	1.3934e+06	464953	394378	131549	974665	NA	NA	NA	974665	0.25	596069	1	0.611563	NA
A0A218KGR2	APP	Amyloid beta A4 protein isoform a OS=Homo sapiens OX=9606 GN=APP PE=4 SV=1	6	4	11	4	1	770	86.9	4.83	18.09	4	0	1.5466e+06	9.99948e+06	1.38643e+07	6.8468e+06	1.38569e+07	2.3257e+06	1.65285e+07	6.61174e+06	9.83073e+06	1	8.0643e+06	1	0.820315	0.686927
A0A0A7E6P0	ERAP1	Aminopeptidase (Fragment) OS=Homo sapiens OX=9606 GN=ERAP1 PE=2 SV=1	2	2	2	2	1	941	107	6.46	2.9	2	0	1.57309e+06	2.02737e+06	NA	NA	1.92268e+06	1.46134e+06	NA	NA	1.69201e+06	0.5	1.80023e+06	0.5	1.06396	0.769948
Q86YW5	TREML1	Trem-like transcript 1 protein OS=Homo sapiens OX=9606 GN=TREML1 PE=1 SV=2	5	1	8	1	1	311	32.7	6.05	19.07	1	0	1.69063e+06	1.11931e+07	3.37012e+06	1.22841e+06	9700332	6.55891e+06	5.6876e+06	NA	7.31561e+06	0.75	4.37056e+06	1	0.597428	0.360749
P02786	TFRC	Transferrin receptor protein 1 OS=Homo sapiens OX=9606 GN=TFRC PE=1 SV=2	6	4	6	4	1	760	84.8	6.61	15.03	4	0	1.7182e+06	NA	2.01084e+07	8.70035e+06	6.76422e+06	NA	5.41307e+06	5.0873e+06	5.75486e+06	0.75	1.01757e+07	0.75	1.76818	0.457733
B2R7Y0	#N/A	cDNA, FLJ93654, highly similar to Homo sapiens serpin peptidase inhibitor, clade B (ovalbumin), member 2 (SERPINB2), mRNA OS=Homo sapiens OX=9606 PE=2 SV=1	5	2	6	2	1	415	46.6	5.64	14.74	2	0	1.71871e+06	NA	2.07599e+06	3.61305e+06	NA	6.33558e+06	6.04573e+06	5.62249e+06	6.00127e+06	0.75	2.46925e+06	0.75	0.411455	0.00460687
P78492	ITIL	Inter-alpha-trypsin inhibitor (Fragment) OS=Homo sapiens OX=9606 GN=ITIL PE=2 SV=1	96	7	92	1	1	51	5.7	4.89	226.08	7	0	1.75038e+06	2.42548e+06	8.10536e+06	2.7717e+06	2.76117e+06	2.41722e+06	3.84188e+06	5.82111e+06	3.71034e+06	1	3.76323e+06	1	1.01425	0.975491
Q59FG9	#N/A	Chondroitin sulfate proteoglycan 2 (Versican) variant (Fragment) OS=Homo sapiens OX=9606 PE=2 SV=1	1	2	2	2	1	3410	374.1	4.53	3.8	2	0	1.7574e+06	2.04874e+06	5.77456e+06	NA	NA	240595	1.84982e+06	640918	910445	0.75	3.19357e+06	0.75	3.5077	0.17356
A0A384NL58	#N/A	Epididymis secretory sperm binding protein OS=Homo sapiens OX=9606 PE=2 SV=1	5	1	4	1	1	353	37.4	8.95	6.9	1	0	1.84087e+06	378747	470486	NA	141350	NA	NA	NA	141350	0.25	896701	0.75	6.34383	NA
A0A2P9AWV2	BQ8482_90012	Uncharacterized protein OS=Homo sapiens OX=9606 GN=BQ8482_90012 PE=4 SV=1	16	1	3	1	1	45	4.9	5.17	6	1	0	1.87538e+06	NA	2.94089e+06	2.52545e+06	2.62238e+06	4.83788e+06	2.79562e+06	6.17664e+06	4.10813e+06	1	2.44724e+06	0.75	0.595707	0.172052
Q96S96	PEBP4	Phosphatidylethanolamine-binding protein 4 OS=Homo sapiens OX=9606 GN=PEBP4 PE=1 SV=3	4	1	4	1	1	227	25.7	6.54	3.99	1	0	2.13597e+06	1.60611e+06	2.83369e+06	1.97797e+06	1.61372e+06	1.50767e+06	2.83402e+06	1.62334e+06	1.89469e+06	1	2.13843e+06	1	1.12865	0.570157
Q9HCU0	CD248	Endosialin OS=Homo sapiens OX=9606 GN=CD248 PE=1 SV=1	2	1	4	1	1	757	80.8	5.35	10.75	1	0	2.19086e+06	1.80483e+06	1.68177e+06	684365	1.69814e+06	NA	NA	NA	1.69814e+06	0.25	1.59046e+06	1	0.936586	NA
Q9UL83	#N/A	Myosin-reactive immunoglobulin light chain variable region (Fragment) OS=Homo sapiens OX=9606 PE=2 SV=1	36	2	8	1	1	108	11.8	8.68	27.26	2	0	2.22239e+06	NA	1.82152e+06	3.37729e+06	14574171	5.73039e+06	3.51664e+06	1.67418e+06	6.37385e+06	1	2.47373e+06	0.75	0.388107	0.303534
A0A024R5F9	B3GNT6	UDP-GlcNAc:betaGal beta-1,3-N-acetylglucosaminyltransferase 6, isoform CRA_a OS=Homo sapiens OX=9606 GN=B3GNT6 PE=4 SV=1	6	2	5	2	1	415	47.1	7.2	8.78	2	0	2.23719e+06	863891	736402	440195	1.59677e+06	1.99186e+06	NA	683966	1.4242e+06	0.75	1.06942e+06	1	0.750893	0.562827
B2R7C7	#N/A	Alkaline phosphatase OS=Homo sapiens OX=9606 PE=2 SV=1	2	1	1	1	1	535	57.8	6.29	1.82	1	0	2.23747e+06	2.80689e+06	650916	2.62192e+06	NA	774851	1.25751e+06	1.54152e+06	1.19129e+06	0.75	2.0793e+06	1	1.74542	0.20524
Q9UNN8	PROCR	Endothelial protein C receptor OS=Homo sapiens OX=9606 GN=PROCR PE=1 SV=1	7	2	5	2	1	238	26.7	7.18	7.43	2	0	2.26112e+06	8.93453e+06	6.17586e+06	7.59098e+06	11739293	1.24699e+07	1.51579e+07	2.7752e+06	1.05356e+07	1	6.24062e+06	1	0.592338	0.20885
B2RBW9	#N/A	cDNA, FLJ95746, highly similar to Homo sapiens inhibin, beta C (INHBC), mRNA OS=Homo sapiens OX=9606 PE=2 SV=1	8	2	6	2	1	352	38.2	7.11	11.72	2	0	2.27122e+06	1.99443e+06	5.71815e+06	3.76418e+06	2438361	1.34911e+06	3.27595e+06	1.62799e+06	2.17285e+06	1	3.43699e+06	1	1.58179	0.235102
A0A024R1G8	APOL1	Apolipoprotein L, 1, isoform CRA_b OS=Homo sapiens OX=9606 GN=APOL1 PE=4 SV=1	24	13	90	1	1	414	45.8	6.29	231.76	13	0	2.31466e+06	NA	NA	4.25664e+07	NA	8.85347e+06	NA	NA	8.85347e+06	0.25	2.24405e+07	0.5	2.53466	NA
H0YJW9	#N/A	Uncharacterized protein (Fragment) OS=Homo sapiens OX=9606 PE=1 SV=3	18	3	47	1	1	148	17	10.86	131.24	3	0	2.47798e+06	5.73887e+06	NA	2.74278e+06	12440512	5.97064e+06	7.91054e+06	962667	6.82109e+06	1	3.65321e+06	0.75	0.535575	0.331298
Q6LDC6	vitamin	Vitamin D binding protein protein (Fragment) OS=Homo sapiens OX=9606 GN=vitamin D binding protein PE=4 SV=1	100	2	36	1	1	17	2.1	7.25	55.84	2	0	2.56162e+06	1.25028e+07	1.05858e+07	1.80773e+07	113021601	1.71937e+07	2.66033e+07	5.3441e+06	4.05407e+07	1	1.09319e+07	1	0.269652	0.276833
V9HWP2	HEL-S-125m	Epididymis luminal protein 35 OS=Homo sapiens OX=9606 GN=HEL-S-125m PE=2 SV=1	4	3	8	2	1	803	92.4	4.84	13.73	3	0	2.61851e+06	3.65376e+06	6.05436e+06	4.74009e+06	5.37217e+06	2.41224e+06	3.25027e+06	625433	2.91503e+06	1	4.26668e+06	1	1.46369	0.313963
A0A024RD26	GPR116	G protein-coupled receptor 116, isoform CRA_a OS=Homo sapiens OX=9606 GN=GPR116 PE=3 SV=1	2	2	6	2	1	1346	149.3	6.65	14.54	2	0	2.65593e+06	NA	NA	NA	2.81176e+06	7.10014e+06	3.52738e+06	NA	4.47976e+06	0.75	2.65593e+06	0.25	0.592873	NA
A0A0X9V9B3	#N/A	MS-F1 light chain variable region (Fragment) OS=Homo sapiens OX=9606 PE=2 SV=1	12	1	7	1	1	112	12.1	5.96	19.67	1	0	2.85424e+06	NA	4.23028e+06	9.43511e+06	5.07309e+06	2.31431e+06	NA	8.65788e+06	5.34843e+06	0.75	5.50654e+06	0.75	1.02956	0.956403
P0DJI9	SAA2	Serum amyloid A-2 protein OS=Homo sapiens OX=9606 GN=SAA2 PE=1 SV=1	52	8	39	4	1	122	13.5	9.14	127.59	8	0	2.90728e+06	NA	4.65133e+07	1.20458e+06	419635202	2.81048e+07	5.23767e+06	142920	1.1328e+08	1	1.6875e+07	0.75	0.148967	0.464095
B2R7N9	#N/A	cDNA, FLJ93532, highly similar to Homo sapiens osteomodulin (OMD), mRNA OS=Homo sapiens OX=9606 PE=2 SV=1	2	1	1	1	1	421	49.4	5.52	1.71	1	0	2.926e+06	897261	1.52782e+06	1.87476e+06	1.86461e+06	NA	NA	NA	1.86461e+06	0.25	1.80646e+06	1	0.968817	NA
Q9UL78	#N/A	Myosin-reactive immunoglobulin light chain variable region (Fragment) OS=Homo sapiens OX=9606 PE=2 SV=1	51	4	22	1	1	109	11.6	8.29	51.64	4	0	2.97125e+06	469418	3.1771e+06	6.56208e+06	23202056	1.67122e+07	7.67821e+06	741908	1.20836e+07	1	3.29496e+06	1	0.272681	0.135478
P13647	KRT5	Keratin, type II cytoskeletal 5 OS=Homo sapiens OX=9606 GN=KRT5 PE=1 SV=3	18	10	20	5	1	590	62.3	7.74	39.02	10	0	2.98091e+06	NA	2.70475e+07	9.48356e+06	1.29732e+07	3.77458e+07	1.24607e+06	3.70527e+06	1.39176e+07	1	1.31707e+07	0.75	0.946332	0.950945
P04406	GAPDH	Glyceraldehyde-3-phosphate dehydrogenase OS=Homo sapiens OX=9606 GN=GAPDH PE=1 SV=3	34	6	20	6	1	335	36	8.46	29.4	6	0	3.01679e+06	8.00723e+06	1.74024e+06	853900	436160	269897	NA	227615	311224	0.75	3.40454e+06	1	10.9392	0.162721
Q15063	POSTN	Periostin OS=Homo sapiens OX=9606 GN=POSTN PE=1 SV=2	5	3	5	3	1	836	93.3	7.53	10.08	3	0	3.04496e+06	NA	4.74579e+06	NA	1576692	NA	NA	NA	1576692	0.25	3.89537e+06	0.5	2.4706	NA
P02042	HBD	Hemoglobin subunit delta OS=Homo sapiens OX=9606 GN=HBD PE=1 SV=2	48	7	35	2	1	147	16	8.05	92.79	7	0	3.08459e+06	4.48231e+07	4.4135e+06	2.30967e+06	NA	NA	NA	2.12211e+07	2.12211e+07	0.25	1.36577e+07	1	0.643591	NA
Q9UBG0	MRC2	C-type mannose receptor 2 OS=Homo sapiens OX=9606 GN=MRC2 PE=1 SV=2	1	1	3	1	1	1479	166.6	5.83	8.14	1	0	3.23762e+06	NA	NA	NA	2.00723e+06	717894	1.21866e+06	NA	1.3146e+06	0.75	3.23762e+06	0.25	2.46283	NA
P13796	LCP1	Plastin-2 OS=Homo sapiens OX=9606 GN=LCP1 PE=1 SV=6	12	6	24	6	1	627	70.2	5.43	48.86	6	0	3.32751e+06	4.34262e+06	1.51918e+07	1.2947e+07	15223412	5.28414e+06	8.51351e+06	NA	9.67369e+06	0.75	8.95225e+06	1	0.925423	0.873612
B4DY90	#N/A	Tubulin beta chain OS=Homo sapiens OX=9606 PE=2 SV=1	20	4	11	4	1	464	52	4.92	9.48	4	0	3.50185e+06	1.32315e+06	1.89955e+06	1.05447e+06	NA	979451	126707	229581	445246	0.75	1.94476e+06	1	4.36782	0.0806593
Q53GZ6	#N/A	Heat shock 70kDa protein 8 isoform 1 variant (Fragment) OS=Homo sapiens OX=9606 PE=2 SV=1	10	5	17	4	1	646	70.9	5.41	28.45	5	0	3.51025e+06	1.72883e+06	1.95752e+06	141124	571023	3.04958e+06	1.25858e+06	418817	1.3245e+06	1	1.83443e+06	1	1.385	0.597898
O14960	LECT2	Leukocyte cell-derived chemotaxin-2 OS=Homo sapiens OX=9606 GN=LECT2 PE=1 SV=2	6	1	3	1	1	151	16.4	9.39	6.78	1	0	3.53897e+06	6.13344e+06	4.98157e+06	1.79331e+06	2.34854e+06	NA	2.15392e+06	1.41781e+06	1.97342e+06	0.75	4.11182e+06	1	2.0836	0.118093
Q59EN5	#N/A	Prosaposin variant (Fragment) OS=Homo sapiens OX=9606 PE=2 SV=1	2	1	3	1	1	530	58.7	5.1	6.41	1	0	3.65594e+06	2.952e+06	2.26354e+06	2.41643e+06	3.54697e+06	3.8901e+06	2.73437e+06	2.2027e+06	3.09354e+06	1	2.82198e+06	1	0.912218	0.603747
B2R7D2	#N/A	cDNA, FLJ93389, highly similar to Homo sapiens multiple inositol polyphosphate histidine phosphatase, 1 (MINPP1), mRNA OS=Homo sapiens OX=9606 PE=2 SV=1	3	1	6	1	1	487	55.1	7.97	18.71	1	0	3.78481e+06	3.62341e+06	NA	NA	8624542	6.9554e+06	4.82543e+06	1.69818e+06	5.52589e+06	1	3.70411e+06	0.5	0.670319	0.461995
A0A087WTY6	NBL1	Neuroblastoma suppressor of tumorigenicity 1 OS=Homo sapiens OX=9606 GN=NBL1 PE=1 SV=1	3	1	2	1	1	215	23.2	5.21	0	1	0	3.79415e+06	1.55218e+06	2.29637e+06	607514	NA	999525	634796	1.2849e+06	973076	0.75	2.06255e+06	1	2.11962	0.237093
Q9UKX2	MYH2	Myosin-2 OS=Homo sapiens OX=9606 GN=MYH2 PE=1 SV=1	1	2	2	1	1	1941	222.9	5.82	4.16	2	1	3.9156e+06	NA	3.42775e+07	6.72887e+07	NA	4.37573e+07	NA	1.49793e+07	2.93683e+07	0.5	3.51606e+07	0.75	1.19723	0.837678
P23468	PTPRD	Receptor-type tyrosine-protein phosphatase delta OS=Homo sapiens OX=9606 GN=PTPRD PE=1 SV=2	1	1	2	1	1	1912	214.6	6.57	4.82	1	0	4.18699e+06	1.65682e+06	1.27315e+06	2.29599e+06	1846928	2.96637e+06	2.65793e+06	1.77918e+06	2.3126e+06	1	2.35324e+06	1	1.01757	0.956279
Q12841	FSTL1	Follistatin-related protein 1 OS=Homo sapiens OX=9606 GN=FSTL1 PE=1 SV=1	4	1	1	1	1	308	35	5.52	2.83	1	0	4.26495e+06	NA	NA	NA	NA	7.40303e+06	6.90558e+06	NA	7.1543e+06	0.5	4.26495e+06	0.25	0.596138	NA
S6BAR0	#N/A	IgG L chain OS=Homo sapiens OX=9606 PE=2 SV=1	28	5	67	1	1	216	23.1	7.69	90.01	5	0	4.27235e+06	NA	NA	NA	NA	NA	1.69145e+06	NA	1.69145e+06	0.25	4.27235e+06	0.25	2.52584	NA
P48668	KRT6C	Keratin, type II cytoskeletal 6C OS=Homo sapiens OX=9606 GN=KRT6C PE=1 SV=3	21	11	22	1	1	564	60	8	47.25	11	4	4.298e+06	3.10396e+06	766208	1.04408e+07	5180437	1.6054e+08	4.92521e+06	2.26328e+07	4.83195e+07	1	4.65225e+06	1	0.0962809	0.290673
Q86TT1	#N/A	Full-length cDNA clone CS0DD006YL02 of Neuroblastoma of Homo sapiens (human) OS=Homo sapiens OX=9606 PE=2 SV=1	41	16	252	1	1	375	41.2	6.79	637.9	16	0	4.33488e+06	NA	9.7075e+07	NA	2.65713e+07	4.26238e+07	1.78358e+07	5.7802e+07	3.62082e+07	1	5.0705e+07	0.5	1.40037	0.667717
A8JZY9	#N/A	Tubulin alpha chain OS=Homo sapiens OX=9606 PE=2 SV=1	22	7	11	7	1	451	50.1	5.06	17.63	7	0	4.34354e+06	4.85341e+06	7.87618e+06	1.76339e+06	2.77469e+06	1.39752e+06	NA	NA	2.08611e+06	0.5	4.70913e+06	1	2.25738	0.245147
Q86U17	SERPINA11	Serpin A11 OS=Homo sapiens OX=9606 GN=SERPINA11 PE=2 SV=2	3	1	7	1	1	422	47	7.68	15.76	1	0	4.49752e+06	4.93155e+06	4.2323e+06	3.88242e+06	3.99533e+06	2.70367e+06	5.72137e+06	279146	3.17488e+06	1	4.38595e+06	1	1.38145	0.339514
P05556	ITGB1	Integrin beta-1 OS=Homo sapiens OX=9606 GN=ITGB1 PE=1 SV=2	3	2	5	2	1	798	88.4	5.39	7.84	2	0	4.56315e+06	3.87676e+06	2.31108e+06	1.23431e+06	NA	NA	NA	3.4189e+06	3.4189e+06	0.25	2.99632e+06	1	0.876399	NA
A0A3B3ISX9	TNXB	Tenascin-X OS=Homo sapiens OX=9606 GN=TNXB PE=4 SV=1	1	4	12	4	1	4491	485.1	5.34	26.07	4	0	4.57257e+06	728655	758759	742017	3.11651e+06	5.19045e+06	2.42227e+06	NA	3.57641e+06	0.75	1.7005e+06	1	0.475477	0.217291
A0A161I202	LTF	Lactoferrin OS=Homo sapiens OX=9606 GN=LTF PE=2 SV=1	8	5	10	5	1	711	78.3	8.18	21.24	5	0	4.87893e+06	5.24271e+06	7.37736e+06	7.89293e+06	2.49393e+07	1.06468e+07	1.55246e+07	6.18374e+06	1.43236e+07	1	6.34798e+06	1	0.443183	0.0990541
A0A2U8J8W7	IgH	Ig heavy chain variable region (Fragment) OS=Homo sapiens OX=9606 GN=IgH PE=2 SV=1	20	2	3	1	1	98	10.8	8.47	6.95	2	0	5.01233e+06	4.24496e+06	4.65236e+06	6.5559e+06	NA	NA	NA	1.23689e+07	1.23689e+07	0.25	5.11639e+06	1	0.413649	NA
Q9UHG3	PCYOX1	Prenylcysteine oxidase 1 OS=Homo sapiens OX=9606 GN=PCYOX1 PE=1 SV=3	8	4	9	4	1	505	56.6	6.18	4.35	4	0	5.02091e+06	3.45086e+07	2.51281e+07	1.70744e+07	1.69217e+07	5.7822e+06	1.09732e+07	1.29128e+07	1.16475e+07	1	2.0433e+07	1	1.75429	0.235608
A0A0M6L0F6	GHB1	Growth hormone B1 OS=Homo sapiens OX=9606 GN=GHB1 PE=2 SV=1	20	4	18	4	1	217	25	5.59	26.57	4	0	5.18062e+06	2.4645e+06	3.51323e+07	3.44101e+07	NA	1.98306e+07	4.08448e+07	2.90991e+07	2.99248e+07	0.75	1.92969e+07	1	0.644845	0.407232
B9EJA8	MRC1L1	Mannose receptor, C type 1-like 1 OS=Homo sapiens OX=9606 GN=MRC1L1 PE=2 SV=1	1	2	4	2	1	1456	165.9	6.51	10.13	2	0	5.211e+06	NA	1.89391e+07	8.84683e+06	NA	2.36117e+06	NA	1.22719e+07	7.31653e+06	0.5	1.0999e+07	0.75	1.50331	0.608608
C9JC84	FGG	Fibrinogen gamma chain OS=Homo sapiens OX=9606 GN=FGG PE=1 SV=1	9	4	8	4	1	461	52.3	5.63	21.77	4	0	5.21466e+06	7.76687e+07	1.55258e+07	1.22558e+07	NA	NA	NA	7.35901e+06	7.35901e+06	0.25	27666255	1	3.75951	NA
P35556	FBN2	Fibrillin-2 OS=Homo sapiens OX=9606 GN=FBN2 PE=1 SV=3	1	3	7	2	1	2912	314.6	4.86	15.74	3	0	5.34915e+06	1.31812e+06	2.58379e+06	7.23694e+06	NA	6.84357e+06	5.96393e+06	5.45787e+06	6.08845e+06	0.75	4.122e+06	1	0.677019	0.278296
P11717	IGF2R	Cation-independent mannose-6-phosphate receptor OS=Homo sapiens OX=9606 GN=IGF2R PE=1 SV=3	2	5	13	5	1	2491	274.2	5.94	23.31	5	0	5.35735e+06	9.35358e+06	2.52019e+06	2.74183e+06	31689910	8.35118e+06	7.76188e+06	8.68148e+06	14121113	1	4.99324e+06	1	0.353601	0.183411
B4E0X1	#N/A	Beta-2-microglobulin OS=Homo sapiens OX=9606 PE=2 SV=1	19	2	6	2	1	122	13.9	7.44	16.9	2	0	5.70082e+06	2.7495e+08	1.3662e+07	7.87884e+06	194187282	2.03787e+08	2.98064e+08	NA	2.32013e+08	0.75	75547849	1	0.32562	0.119525
Q59EB6	#N/A	Complement component 1, q subcomponent, receptor 1 variant (Fragment) OS=Homo sapiens OX=9606 PE=2 SV=1	2	1	9	1	1	671	70.4	5.44	22.73	1	0	5.72021e+06	1.50025e+06	1.47223e+06	1.88262e+06	3924563	4.59771e+06	5.35417e+06	1.46105e+06	3.83437e+06	1	2.64383e+06	1	0.689508	0.405503
P39060	COL18A1	Collagen alpha-1(XVIII) chain OS=Homo sapiens OX=9606 GN=COL18A1 PE=1 SV=5	2	4	9	4	1	1754	178.1	6.01	18.93	4	0	5.95767e+06	1.14325e+07	1.31575e+07	2.38839e+06	5.95525e+06	3.73068e+06	6.21778e+06	5.76324e+06	5.41674e+06	1	8.234e+06	1	1.5201	0.31068
B4DTI5	#N/A	cDNA FLJ51544, highly similar to Pregnancy-specific beta-1-glycoprotein 5 OS=Homo sapiens OX=9606 PE=2 SV=1	26	10	120	1	1	333	37.7	8.19	243.73	10	0	6.08427e+06	2.17902e+06	684611	896909	3.62851e+06	1.64441e+07	7.14951e+06	NA	9.07403e+06	0.75	2.4612e+06	1	0.271236	0.119464
P07737	PFN1	Profilin-1 OS=Homo sapiens OX=9606 GN=PFN1 PE=1 SV=2	46	5	11	5	1	140	15	8.27	22.37	5	0	6.10077e+06	1.82822e+07	2.68444e+07	162605	2.47052e+07	5.04942e+06	2.86225e+06	916022	8.38323e+06	1	1.28475e+07	1	1.53252	0.603302
P01709	IGLV2-8	Immunoglobulin lambda variable 2-8 OS=Homo sapiens OX=9606 GN=IGLV2-8 PE=1 SV=2	14	2	10	1	1	118	12.4	5.91	17.71	2	0	6.47491e+06	3.95401e+06	1.65071e+07	9.13845e+06	1.01226e+07	1.45137e+07	7.33727e+06	4.6331e+07	1.95761e+07	1	9.01862e+06	1	0.460695	0.306061
P28799	GRN	Granulins OS=Homo sapiens OX=9606 GN=GRN PE=1 SV=2	5	2	9	2	1	593	63.5	6.83	24.72	2	0	6.55901e+06	1.64602e+06	4.90588e+06	1.76545e+06	1.19555e+06	4.14644e+06	6.57862e+06	2.42183e+06	3.58561e+06	1	3.71909e+06	1	1.03723	0.939309
Q9H4A9	DPEP2	Dipeptidase 2 OS=Homo sapiens OX=9606 GN=DPEP2 PE=1 SV=3	13	6	27	6	1	486	53.3	6.54	62.95	6	0	6.57934e+06	5.1425e+06	5.52084e+06	1.38046e+07	2.705e+07	1.2565e+07	1.96569e+07	4.67864e+06	1.59876e+07	1	7.76182e+06	1	0.485488	0.165181
A8K2X4	#N/A	cDNA FLJ75401, highly similar to Homo sapiens endoglin (Osler-Rendu-Weber syndrome 1), mRNA OS=Homo sapiens OX=9606 PE=2 SV=1	9	5	11	5	1	658	70.5	6.61	15.52	5	0	6.76966e+06	3.55926e+07	5.35969e+07	1.34683e+07	1.02961e+07	8.45398e+06	2.46835e+07	5.26454e+07	2.40197e+07	1	2.73569e+07	1	1.13893	0.828932
Q59E93	#N/A	Aminopeptidase (Fragment) OS=Homo sapiens OX=9606 PE=2 SV=1	10	9	26	9	1	977	110.5	5.53	38.52	9	0	6.81357e+06	6.33881e+06	1.73628e+06	7.8898e+06	5.02759e+06	3.50484e+07	9.24705e+06	7.76377e+06	1.42717e+07	1	5.69461e+06	1	0.399015	0.273179
O75326	SEMA7A	Semaphorin-7A OS=Homo sapiens OX=9606 GN=SEMA7A PE=1 SV=1	3	2	7	2	1	666	74.8	7.64	11.73	2	0	6.83952e+06	4.60791e+06	NA	NA	NA	8.41315e+06	NA	4.34735e+06	6.38025e+06	0.5	5.72372e+06	0.5	0.897099	0.803704
P04066	FUCA1	Tissue alpha-L-fucosidase OS=Homo sapiens OX=9606 GN=FUCA1 PE=1 SV=4	4	2	7	2	1	466	53.7	6.84	7.99	2	0	6.85787e+06	7.96255e+06	2.7471e+06	4.55257e+06	990080	8.53895e+06	3.96508e+06	7.94858e+06	5.36067e+06	1	5.53002e+06	1	1.03159	0.939096
P49641	MAN2A2	Alpha-mannosidase 2x OS=Homo sapiens OX=9606 GN=MAN2A2 PE=2 SV=3	1	1	4	1	1	1150	130.5	6.84	8.86	1	0	7.07818e+06	5.88027e+06	7.8962e+06	7.69615e+06	8553975	6.93359e+06	5.09853e+06	3.1691e+06	5.9388e+06	1	7.1377e+06	1	1.20188	0.373676
Q6ZMX3	#N/A	cDNA FLJ16614 fis, clone TESTI4013365 OS=Homo sapiens OX=9606 PE=2 SV=1	4	1	1	1	1	619	69.9	5.02	2.08	1	0	7.62984e+06	2.44441e+06	451900	NA	5532109	2.32567e+07	1.41167e+07	NA	1.43019e+07	0.75	3.50872e+06	0.75	0.245333	0.12354
Q99784	OLFM1	Noelin OS=Homo sapiens OX=9606 GN=OLFM1 PE=1 SV=4	2	1	3	1	1	485	55.3	6.95	6.33	1	0	8.04743e+06	2.71313e+06	NA	NA	5573510	5.59129e+06	5.3597e+06	1.21332e+06	4.43446e+06	1	5.38028e+06	0.5	1.21329	0.701397
A8K486	#N/A	Peptidyl-prolyl cis-trans isomerase OS=Homo sapiens OX=9606 PE=2 SV=1	26	4	19	4	1	165	18	6.9	28.33	4	0	8.09429e+06	8.37633e+06	4.82942e+06	1.10792e+06	1.5296e+07	6.6193e+06	4.24602e+06	527891	6.6723e+06	1	5.60199e+06	1	0.839589	0.774279
A0A0D9SES6	KISS1	Metastasis-suppressor KiSS-1 OS=Homo sapiens OX=9606 GN=KISS1 PE=1 SV=1	9	1	3	1	1	144	15.1	10.14	7.2	1	0	8.11676e+06	5.30127e+06	5.41304e+06	NA	NA	NA	4.63789e+06	1.75915e+06	3.19852e+06	0.5	6.27702e+06	0.75	1.96248	0.150203
Q9BTY2	FUCA2	Plasma alpha-L-fucosidase OS=Homo sapiens OX=9606 GN=FUCA2 PE=1 SV=2	4	2	12	2	1	467	54	6.25	25.98	2	0	8.29028e+06	1.53219e+07	1.00281e+07	9.7566e+06	1.3438e+07	1.04975e+07	1.37731e+07	1.81927e+07	1.39753e+07	1	1.08492e+07	1	0.776314	0.207024
P07339	CTSD	Cathepsin D OS=Homo sapiens OX=9606 GN=CTSD PE=1 SV=1	17	6	16	6	1	412	44.5	6.54	22.79	6	0	8.80979e+06	1.99608e+07	2.21873e+07	1.66405e+07	1.50012e+07	2.18982e+07	5.99468e+06	9.54364e+06	1.31094e+07	1	1.68996e+07	1	1.28912	0.435481
B7Z9B1	#N/A	cDNA FLJ52398, highly similar to Cadherin-13 OS=Homo sapiens OX=9606 PE=2 SV=1	5	3	9	3	1	760	83.4	5.12	23.69	3	0	8.92408e+06	3.05048e+06	NA	NA	2.87811e+06	6.75458e+06	6.2989e+06	2.06683e+06	4.49961e+06	1	5.98728e+06	0.5	1.33062	0.588022
A0A0C4DH25	IGKV3D-20	Immunoglobulin kappa variable 3D-20 OS=Homo sapiens OX=9606 GN=IGKV3D-20 PE=3 SV=1	14	2	6	1	1	116	12.5	4.59	11.5	2	0	9.1002e+06	821589	1.04332e+07	2.13406e+07	10822671	8.52581e+06	5.27326e+06	9.04616e+06	8.41698e+06	1	1.04239e+07	1	1.23844	0.662255
Q9H8L6	MMRN2	Multimerin-2 OS=Homo sapiens OX=9606 GN=MMRN2 PE=1 SV=2	1	1	2	1	1	949	104.3	5.86	4.88	1	0	9.1242e+06	8.54437e+06	6.39387e+06	NA	NA	NA	1.11656e+07	8.95275e+06	1.00592e+07	0.5	8.02081e+06	0.75	0.797362	0.228927
A0A2R8Y6G6	ENO1	Alpha-enolase OS=Homo sapiens OX=9606 GN=ENO1 PE=1 SV=1	33	9	25	9	1	434	47.3	6.99	35.22	9	0	9.94531e+06	4.65208e+06	3.54902e+06	1.35954e+06	3.42518e+06	1.40654e+06	259451	548970	1.41004e+06	1	4.87649e+06	1	3.45841	0.127037
Q86SQ4	ADGRG6	Adhesion G-protein coupled receptor G6 OS=Homo sapiens OX=9606 GN=ADGRG6 PE=1 SV=3	4	4	13	4	1	1221	136.6	7.87	33.88	4	0	9.97202e+06	NA	NA	NA	NA	1.22001e+07	NA	2.00751e+07	1.61376e+07	0.5	9.97202e+06	0.25	0.617937	NA
A0A024R1U8	IGFBP4	Insulin-like growth factor binding protein 4, isoform CRA_a OS=Homo sapiens OX=9606 GN=IGFBP4 PE=4 SV=1	31	5	16	5	1	258	27.9	7.15	39.68	5	0	1.00452e+07	1.55435e+07	1.14209e+07	1.3262e+08	1.09834e+07	2.24364e+07	5.88647e+06	1.20841e+08	4.00369e+07	1	4.24074e+07	1	1.05921	0.955263
E7EX29	YWHAZ	14-3-3 protein zeta/delta (Fragment) OS=Homo sapiens OX=9606 GN=YWHAZ PE=1 SV=1	11	2	3	2	1	246	28	4.92	8.22	2	0	1.00682e+07	2.58127e+07	NA	NA	13049701	1.26742e+07	7.27474e+06	NA	1.09995e+07	0.75	1.79405e+07	0.5	1.63102	0.353808
G3V1C5	IL18BP	Interleukin 18 binding protein, isoform CRA_a OS=Homo sapiens OX=9606 GN=IL18BP PE=1 SV=1	4	1	2	1	1	199	21.9	7.64	3.82	1	0	1.02298e+07	NA	NA	NA	NA	2.43933e+07	9.89915e+06	NA	1.71462e+07	0.5	1.02298e+07	0.25	0.596619	NA
K4DIA0	ICOSLG	ICOS ligand OS=Homo sapiens OX=9606 GN=ICOSLG PE=1 SV=1	4	2	13	2	1	473	51.9	8.05	27.79	2	0	1.05487e+07	8.23257e+06	1.81598e+06	5.74201e+06	13658166	1.65109e+07	2.32625e+07	6.37682e+06	1.49521e+07	1	6.58481e+06	1	0.440394	0.0792967
P14543	NID1	Nidogen-1 OS=Homo sapiens OX=9606 GN=NID1 PE=1 SV=3	5	6	28	6	1	1247	136.3	5.29	52.45	6	0	1.07851e+07	39288685	1.74518e+07	1.67843e+07	6.5589e+07	3.52312e+07	101087136	5.10948e+06	5.17542e+07	1	2.10775e+07	1	0.407261	0.203392
B2R582	#N/A	cDNA, FLJ92374, highly similar to Homo sapiens C-type lectin domain family 3, member B (CLEC3B), mRNA OS=Homo sapiens OX=9606 PE=2 SV=1	44	6	45	1	1	202	22.5	6.04	106	6	0	1.10124e+07	6.05599e+06	NA	1.24265e+06	NA	9.51237e+06	2.32609e+07	NA	1.63866e+07	0.5	6.10368e+06	0.75	0.372479	0.200375
J3K000	PEPD	PEPD protein OS=Homo sapiens OX=9606 GN=PEPD PE=2 SV=1	5	3	7	3	1	493	54.5	6	13.36	3	0	1.11415e+07	5.45158e+06	7.64041e+06	2.68987e+06	10126541	1.404e+06	1.25938e+07	6.67323e+06	7.69939e+06	1	6.73084e+06	1	0.874205	0.758599
D6RE86	CP	Ceruloplasmin (Fragment) OS=Homo sapiens OX=9606 GN=CP PE=1 SV=8	38	6	145	2	1	178	20.7	7.24	331.79	6	0	1.16665e+07	5.56151e+06	NA	2.9884e+06	5.57007e+06	1.81568e+07	3.13712e+06	7.22399e+06	8.52199e+06	1	6.73881e+06	0.75	0.790755	0.706975
P00739	HPR	Haptoglobin-related protein OS=Homo sapiens OX=9606 GN=HPR PE=2 SV=2	50	19	217	5	1	348	39	7.09	544.51	19	0	1.16731e+07	7.02606e+07	1.72557e+08	3.30515e+07	73055332	6.85752e+07	1.92176e+07	6.72856e+07	5.70335e+07	1	7.18856e+07	1	1.26041	0.708364
A0A140TA29	C4B	Complement C4-B OS=Homo sapiens OX=9606 GN=C4B PE=1 SV=1	43	82	963	1	1	1698	187.5	7.33	2557.36	82	2	1.17995e+07	7.30864e+07	4.67955e+07	8.72886e+07	245071593	169495786	3.70018e+08	NA	2.61528e+08	0.75	5.47425e+07	1	0.209318	0.0111468
P05362	ICAM1	Intercellular adhesion molecule 1 OS=Homo sapiens OX=9606 GN=ICAM1 PE=1 SV=2	9	4	13	4	1	532	57.8	7.99	26.82	4	0	1.18032e+07	NA	8.03718e+06	5.76284e+06	1.1711e+07	1.47901e+07	1.05032e+07	235165	9.30987e+06	1	8.53439e+06	0.75	0.916704	0.854453
Q8TAQ9	SUN3	SUN domain-containing protein 3 OS=Homo sapiens OX=9606 GN=SUN3 PE=1 SV=4	2	2	8	2	1	357	40.5	7.83	15.95	2	0	1.18362e+07	5.06002e+06	6.53476e+06	6.14297e+06	4925160	4.70535e+06	4.58256e+06	5.25357e+06	4.86666e+06	1	7.39349e+06	1	1.51921	0.147613
P21333	FLNA	Filamin-A OS=Homo sapiens OX=9606 GN=FLNA PE=1 SV=4	6	13	25	13	1	2647	280.6	6.06	58.56	13	0	1.20444e+07	5.82057e+07	4.84318e+07	9.22795e+06	8.11738e+07	2.89483e+07	3.88689e+06	5.99647e+06	3.00014e+07	1	3.19775e+07	1	1.06587	0.931015
P01706	IGLV2-11	Immunoglobulin lambda variable 2-11 OS=Homo sapiens OX=9606 GN=IGLV2-11 PE=1 SV=2	13	2	8	1	1	119	12.6	7.24	15.5	2	0	1.20901e+07	NA	5.43403e+06	4.87727e+06	8694620	1.19184e+07	1.09769e+07	1.54968e+07	1.17717e+07	1	7.46714e+06	0.75	0.634331	0.153612
B7ZKJ8	ITIH4	ITIH4 protein OS=Homo sapiens OX=9606 GN=ITIH4 PE=1 SV=1	33	32	394	1	1	935	103.8	6.89	980.31	32	0	1.20953e+07	1.41341e+07	6.32526e+07	2.83308e+07	8.17031e+06	4.32825e+07	4.63055e+07	3.19948e+07	3.24383e+07	1	2.94532e+07	1	0.907978	0.845372
B4DR52	#N/A	Histone H2B OS=Homo sapiens OX=9606 PE=2 SV=1	20	3	18	3	1	166	18	10.32	23.66	3	0	1.21629e+07	1.09626e+07	26526246	4.50557e+06	1.38658e+07	3.6258e+06	2.16448e+06	1.07846e+06	5.18363e+06	1	1.35393e+07	1	2.61194	0.179297
P02533	KRT14	Keratin, type I cytoskeletal 14 OS=Homo sapiens OX=9606 GN=KRT14 PE=1 SV=4	16	8	26	2	1	472	51.5	5.16	51.25	8	2	1.25472e+07	5.40308e+06	4.06456e+06	3.59337e+06	1.52141e+06	5.01334e+07	1.11033e+07	1.38524e+07	1.91526e+07	1	6.40205e+06	1	0.334265	0.284907
Q9UQ72	PSG11	Pregnancy-specific beta-1-glycoprotein 11 OS=Homo sapiens OX=9606 GN=PSG11 PE=2 SV=3	29	8	71	1	1	335	37.1	7.14	166.09	8	0	1.26078e+07	8.61443e+06	1.2191e+07	NA	NA	3.16667e+07	7.42776e+06	NA	1.95472e+07	0.5	1.11377e+07	0.75	0.569786	0.427198
Q86UD1	OAF	Out at first protein homolog OS=Homo sapiens OX=9606 GN=OAF PE=2 SV=1	7	2	6	2	1	273	30.7	6.84	10.45	2	0	1.31197e+07	1.43916e+07	1.86162e+07	6.54657e+06	18760546	9.83594e+06	1.60353e+07	2.32512e+06	1.17392e+07	1	1.31685e+07	1	1.12175	0.757684
A8K7Q1	#N/A	cDNA FLJ77770, highly similar to Homo sapiens nucleobindin 1 (NUCB1), mRNA OS=Homo sapiens OX=9606 PE=2 SV=1	2	1	4	1	1	461	53.9	5.25	6.88	1	0	1.32192e+07	NA	3.72595e+06	5.11114e+06	4.83799e+07	4.24292e+06	NA	8.44154e+06	2.03548e+07	0.75	7.35208e+06	0.75	0.361197	0.416809
Q13790	APOF	Apolipoprotein F OS=Homo sapiens OX=9606 GN=APOF PE=1 SV=2	8	2	15	2	1	326	35.4	5.64	41.96	2	0	1.32927e+07	3.35864e+07	7.10501e+06	1.36555e+07	37998011	4.32842e+07	2.60231e+07	2.9758e+06	2.75703e+07	1	1.69099e+07	1	0.613338	0.355449
P14780	MMP9	Matrix metalloproteinase-9 OS=Homo sapiens OX=9606 GN=MMP9 PE=1 SV=3	14	10	22	10	1	707	78.4	6.06	46.94	10	0	1.35218e+07	2.21385e+07	1.21501e+07	8.32398e+06	125193527	1.89896e+07	4.79487e+07	5.25799e+06	4.93474e+07	1	1.40336e+07	1	0.284384	0.238159
O95236	APOL3	Apolipoprotein L3 OS=Homo sapiens OX=9606 GN=APOL3 PE=1 SV=3	4	2	10	1	1	402	44.3	8.16	16.81	2	0	1.35986e+07	NA	NA	NA	NA	2.38312e+07	NA	2.95582e+07	2.66947e+07	0.5	1.35986e+07	0.25	0.509414	NA
P24592	IGFBP6	Insulin-like growth factor-binding protein 6 OS=Homo sapiens OX=9606 GN=IGFBP6 PE=1 SV=1	9	2	6	2	1	240	25.3	7.81	17.52	2	0	1.36926e+07	NA	8.07016e+06	6.67147e+06	NA	9.95662e+06	8.38821e+06	1.0129e+07	9.49129e+06	0.75	9.47809e+06	0.75	0.99861	0.995534
V9HW88	HEL-S-99n	Calreticulin, isoform CRA_b OS=Homo sapiens OX=9606 GN=HEL-S-99n PE=2 SV=1	6	2	2	2	1	417	48.1	4.44	2.04	2	0	1.37301e+07	6.85916e+06	6.79096e+06	1.09558e+06	NA	7.33036e+06	1.18343e+07	NA	9.58232e+06	0.5	7.11894e+06	1	0.742925	0.581658
B2MUX6	IGF2	Insulin-like growth factor 2 OS=Homo sapiens OX=9606 GN=IGF2 PE=3 SV=1	26	2	15	1	1	69	7.6	5.31	42.32	2	0	1.43015e+07	1.09342e+07	960892	3.67243e+06	23695190	1.74524e+07	1.78917e+07	818141	1.49644e+07	1	7.46726e+06	1	0.499003	0.245183
Q07954	LRP1	Prolow-density lipoprotein receptor-related protein 1 OS=Homo sapiens OX=9606 GN=LRP1 PE=1 SV=2	2	10	30	10	1	4544	504.3	5.39	52.97	10	0	1.46162e+07	1.55521e+07	1.59898e+07	7.8557e+06	12672812	9.64461e+06	4.08046e+06	9.57329e+06	8.99279e+06	1	1.35035e+07	1	1.50159	0.135087
V9HW21	HEL-76	Epididymis luminal protein 76 OS=Homo sapiens OX=9606 GN=HEL-76 PE=2 SV=1	7	2	5	2	1	260	29.2	7.4	11.41	2	0	1.47468e+07	3.21269e+07	1.11454e+06	NA	1.33836e+06	NA	NA	9.82343e+06	5.58089e+06	0.5	1.59961e+07	0.75	2.86622	0.449612
Q92823	NRCAM	Neuronal cell adhesion molecule OS=Homo sapiens OX=9606 GN=NRCAM PE=1 SV=3	1	2	7	2	1	1304	143.8	5.66	14.29	2	0	1.47723e+07	4.68149e+06	NA	4.01068e+06	1.46717e+07	1.50452e+07	7.93333e+06	8.64353e+06	1.15735e+07	1	7.82148e+06	0.75	0.675812	0.354906
A8K4E0	#N/A	cDNA FLJ78122 OS=Homo sapiens OX=9606 PE=2 SV=1	8	2	3	2	1	346	36	7.75	11.47	2	0	1.51509e+07	2.20484e+06	5.15749e+06	8.96997e+06	NA	1.9615e+07	6.73636e+06	2.62064e+07	1.75192e+07	0.75	7.87081e+06	1	0.449267	0.157945
P02743	APCS	Serum amyloid P-component OS=Homo sapiens OX=9606 GN=APCS PE=1 SV=2	21	4	11	4	1	223	25.4	6.54	31.2	4	0	1.5237e+07	2.12353e+07	2.83461e+07	2.5645e+07	2.43985e+07	8.33786e+06	1.31831e+07	1.01213e+07	1.40102e+07	1	2.26159e+07	1	1.61425	0.11075
A0N5G5	V-kappa-3	Rheumatoid factor D5 light chain (Fragment) OS=Homo sapiens OX=9606 GN=V-kappa-3 PE=2 SV=1	23	2	15	2	1	118	12.8	8.97	28.97	2	0	1.56722e+07	3.66275e+06	4.1255e+07	6.10993e+07	5.67384e+07	3.56363e+07	2.50045e+07	1.05795e+08	5.57936e+07	1	3.04223e+07	1	0.545265	0.294157
Q8NBJ4	GOLM1	Golgi membrane protein 1 OS=Homo sapiens OX=9606 GN=GOLM1 PE=1 SV=1	8	3	4	3	1	401	45.3	4.97	12.82	3	0	1.5788e+07	NA	NA	NA	NA	8.29899e+06	NA	NA	8.29899e+06	0.25	1.5788e+07	0.25	1.9024	NA
P02675	FGB	Fibrinogen beta chain OS=Homo sapiens OX=9606 GN=FGB PE=1 SV=2	31	13	25	13	1	491	55.9	8.27	56.76	13	0	1.69085e+07	9.84909e+07	4.36203e+07	3.45443e+07	NA	4.48577e+06	NA	18257595	1.13717e+07	0.5	4.8391e+07	1	4.2554	0.238299
O14786	NRP1	Neuropilin-1 OS=Homo sapiens OX=9606 GN=NRP1 PE=1 SV=3	4	3	10	3	1	923	103.1	5.88	25.67	3	0	1.69968e+07	NA	NA	NA	1.25817e+07	1.39973e+07	6.51535e+06	4.20436e+06	9.32467e+06	1	1.69968e+07	0.25	1.82277	NA
J3KPS3	ALDOA	Fructose-bisphosphate aldolase OS=Homo sapiens OX=9606 GN=ALDOA PE=1 SV=1	20	5	11	4	1	368	39.8	8.09	22.09	5	1	1.70996e+07	7.61908e+06	1.7264e+07	7.32815e+06	564678	1.53107e+07	326008	5.99253e+06	5.54849e+06	1	1.23277e+07	1	2.22181	0.181819
Q9BWP8	COLEC11	Collectin-11 OS=Homo sapiens OX=9606 GN=COLEC11 PE=1 SV=1	14	3	8	3	1	271	28.6	5.41	19.71	3	0	1.77627e+07	659069	3.00035e+07	11890599	1.04992e+07	1.18643e+07	1.70009e+06	7.8634e+06	7.98174e+06	1	1.5079e+07	1	1.88918	0.317619
V9H1C1	#N/A	Gelsolin exon 4 (Fragment) OS=Homo sapiens OX=9606 PE=4 SV=1	35	3	34	1	1	69	8	5.78	90.33	3	0	1.77801e+07	2.25285e+07	5.03222e+07	1.57714e+07	39261671	1.21048e+07	3.76793e+07	1.61588e+07	2.63011e+07	1	2.66006e+07	1	1.01139	0.9786
P98160	HSPG2	Basement membrane-specific heparan sulfate proteoglycan core protein OS=Homo sapiens OX=9606 GN=HSPG2 PE=1 SV=4	3	9	21	9	1	4391	468.5	6.51	52.84	9	0	1.77981e+07	4.89396e+07	21296174	2.65812e+06	2.58428e+07	2.21508e+07	1.04185e+07	1.82166e+06	1.50585e+07	1	2.2673e+07	1	1.50567	0.518469
P43251	BTD	Biotinidase OS=Homo sapiens OX=9606 GN=BTD PE=1 SV=2	6	3	15	3	1	543	61.1	6.25	35.35	3	0	1.7858e+07	3.04104e+07	7.54761e+07	5.98707e+07	4.81778e+07	2.85435e+07	2.89822e+07	6.24285e+07	4.2033e+07	1	4.59038e+07	1	1.09209	0.81174
A0A087WXI5	CDH1	Cadherin-1 OS=Homo sapiens OX=9606 GN=CDH1 PE=1 SV=1	3	3	9	3	1	903	100	4.79	21.96	3	0	1.80076e+07	1.80032e+07	7.44457e+06	2.37533e+06	14437797	7.78624e+06	1.5521e+07	1.19252e+07	1.24176e+07	1	1.14577e+07	1	0.9227	0.829961
Q16853	AOC3	Membrane primary amine oxidase OS=Homo sapiens OX=9606 GN=AOC3 PE=1 SV=3	1	1	4	1	1	763	84.6	6.52	8.55	1	0	1.89744e+07	1.3248e+07	9.86529e+06	NA	10733744	1.43755e+07	1.2459e+07	1.571e+07	1.33196e+07	1	1.40292e+07	0.75	1.05328	0.793582
O15031	PLXNB2	Plexin-B2 OS=Homo sapiens OX=9606 GN=PLXNB2 PE=1 SV=3	2	3	3	3	1	1838	205	6.24	3.4	3	0	1.90493e+07	6.67224e+06	2.71642e+07	2.13262e+07	1.05095e+07	1.23923e+07	2.07844e+07	2.84609e+07	1.80368e+07	1	1.8553e+07	1	1.02862	0.933931
A0A087WV75	NCAM1	Neural cell adhesion molecule 1 OS=Homo sapiens OX=9606 GN=NCAM1 PE=1 SV=1	5	4	10	4	1	884	97.3	4.93	20.24	4	0	2.10451e+07	4.84618e+06	1.18648e+07	1.21479e+07	2.54332e+07	3.43715e+07	3.80279e+06	1.82256e+07	2.04583e+07	1	1.2476e+07	1	0.609827	0.313825
B7Z250	#N/A	cDNA FLJ56324, highly similar to Hepatocyte growth factor-like protein OS=Homo sapiens OX=9606 PE=2 SV=1	44	13	73	1	1	339	38.4	7.34	180.71	13	0	2.14148e+07	NA	1.40687e+07	NA	7.19473e+06	2.09687e+07	8.0213e+06	3.55298e+07	1.79286e+07	1	1.77417e+07	0.5	0.989576	0.986314
Q6H9L7	ISM2	Isthmin-2 OS=Homo sapiens OX=9606 GN=ISM2 PE=2 SV=1	12	6	34	6	1	571	63.9	4.81	79.13	6	0	2.20995e+07	2.75985e+07	9.40643e+07	1.77389e+06	4.13954e+07	2.57748e+07	2.52241e+07	1.05283e+07	2.57306e+07	1	3.63841e+07	1	1.41404	0.629753
P35443	THBS4	Thrombospondin-4 OS=Homo sapiens OX=9606 GN=THBS4 PE=1 SV=2	7	5	20	4	1	961	105.8	4.68	54.4	5	0	2.24093e+07	9.42175e+06	847801	1.11729e+06	2.99642e+06	NA	4.1086e+06	2.88037e+06	3.32846e+06	0.75	8.44903e+06	1	2.53842	0.432197
W0UV28	RAA1	Ribonuclease A A1 OS=Homo sapiens OX=9606 GN=RAA1 PE=3 SV=1	27	4	14	4	1	147	16.5	9.64	34.05	4	0	2.25433e+07	2.85489e+06	4.78052e+07	3.27118e+07	42728744	7.82024e+06	2.67128e+07	2.58465e+07	2.57771e+07	1	2.64788e+07	1	1.02722	0.954606
Q6FHX6	FEN1	Flap endonuclease 1 OS=Homo sapiens OX=9606 GN=FEN1 PE=2 SV=1	2	1	1	1	1	380	42.6	8.62	1.67	1	0	2.2701e+07	1.06981e+07	2.77458e+06	NA	NA	NA	1.20624e+07	NA	1.20624e+07	0.25	1.20579e+07	0.75	0.999631	NA
D9ZGF2	COL6A3	Collagen, type VI, alpha 3 OS=Homo sapiens OX=9606 GN=COL6A3 PE=2 SV=1	2	7	13	7	1	3177	343.5	6.68	17.31	7	0	2.31259e+07	2.55443e+06	7.03487e+06	7.40425e+06	4260252	1.15252e+07	9.48575e+06	7.50025e+06	8.19286e+06	1	1.00299e+07	1	1.22422	0.712906
Q9BXP8	PAPPA2	Pappalysin-2 OS=Homo sapiens OX=9606 GN=PAPPA2 PE=1 SV=4	3	6	18	6	1	1791	198.4	5.47	33.27	6	0	2.35293e+07	2.18981e+07	2.40131e+07	2.01773e+06	109724	5.25358e+06	5.74691e+06	2.45059e+06	3.3902e+06	1	1.78646e+07	1	5.26947	0.0380195
G3V2W1	SERPINA10	Protein Z-dependent protease inhibitor OS=Homo sapiens OX=9606 GN=SERPINA10 PE=1 SV=1	14	8	44	8	1	484	55.1	7.64	87.04	8	0	2.36013e+07	4.93013e+07	1.16292e+08	107237310	5.55467e+07	2.23849e+07	5.83018e+07	3.86212e+07	4.37137e+07	1	7.4108e+07	1	1.69531	0.25123
A8K6K4	#N/A	cDNA FLJ77565, highly similar to Homo sapiens interleukin 1 receptor accessory protein (IL1RAP), transcript variant 1, mRNA OS=Homo sapiens OX=9606 PE=2 SV=1	10	6	26	6	1	570	65.4	8.22	56.26	6	0	2.42959e+07	1.93744e+07	1.58255e+07	2.32219e+07	30878694	1.85802e+07	2.44231e+07	1.93212e+07	2.33008e+07	1	2.06794e+07	1	0.887498	0.474338
Q15582	TGFBI	Transforming growth factor-beta-induced protein ig-h3 OS=Homo sapiens OX=9606 GN=TGFBI PE=1 SV=1	21	12	43	12	1	683	74.6	7.71	95.09	12	0	2.49296e+07	5.72662e+07	5.63356e+07	9.39064e+07	6.14059e+07	4.99976e+07	6.87707e+07	1.47861e+08	8.20087e+07	1	5.81094e+07	1	0.708577	0.399775
Q6EMK4	VASN	Vasorin OS=Homo sapiens OX=9606 GN=VASN PE=1 SV=1	6	3	7	3	1	673	71.7	7.39	16.09	3	0	2.5128e+07	1.41219e+06	NA	3.77292e+06	12255217	2.67445e+07	1.93314e+07	1.24975e+07	1.77072e+07	1	1.01044e+07	0.75	0.570638	0.357412
B2RBF5	#N/A	cDNA, FLJ95483, highly similar to Homo sapiens chitobiase, di-N-acetyl- (CTBS), mRNA OS=Homo sapiens OX=9606 PE=2 SV=1	12	4	12	4	1	385	43.8	6.64	22.23	4	0	2.53088e+07	2.00137e+07	1.78396e+07	2.27188e+07	2.25895e+07	4.14203e+07	2.18694e+07	2.9116e+07	2.87488e+07	1	2.14702e+07	1	0.746822	0.180943
D3DQH8	SPARC	Secreted protein, acidic, cysteine-rich (Osteonectin), isoform CRA_a OS=Homo sapiens OX=9606 GN=SPARC PE=4 SV=1	19	6	34	6	1	315	36	4.88	91.38	6	0	2.54012e+07	5.82442e+07	3.7284e+07	4.35717e+07	121892893	4.63968e+07	8.24095e+07	3.21596e+07	7.07147e+07	1	4.11253e+07	1	0.581566	0.212319
A0A024R3X4	HSPD1	Epididymis secretory sperm binding protein OS=Homo sapiens OX=9606 GN=HSPD1 PE=2 SV=1	19	6	23	6	1	573	61	5.87	34.37	6	0	2.54487e+07	5.27165e+06	1.46679e+07	5.39345e+06	1.27222e+06	1.0435e+06	1.77731e+06	804944	1.22449e+06	1	1.26954e+07	1	10.3679	0.0537256
A0A024R6R4	MMP2	Matrix metallopeptidase 2 (Gelatinase A, 72kDa gelatinase, 72kDa type IV collagenase), isoform CRA_a OS=Homo sapiens OX=9606 GN=MMP2 PE=3 SV=1	7	4	18	4	1	660	73.8	5.47	32.09	4	0	2.55804e+07	1.01401e+07	1.43799e+07	4.42911e+06	8.90832e+06	5.76192e+06	1.10569e+07	6.31447e+06	8.0104e+06	1	1.36324e+07	1	1.70183	0.271097
Q9Y5Y7	LYVE1	Lymphatic vessel endothelial hyaluronic acid receptor 1 OS=Homo sapiens OX=9606 GN=LYVE1 PE=1 SV=2	8	3	18	3	1	322	35.2	8.28	34.58	3	0	2.56331e+07	1.26212e+07	4.04461e+07	2.27693e+07	46831384	4.94659e+07	4.44676e+07	1.26639e+07	3.83572e+07	1	2.53674e+07	1	0.661347	0.256769
Q7Z7M0	MEGF8	Multiple epidermal growth factor-like domains protein 8 OS=Homo sapiens OX=9606 GN=MEGF8 PE=1 SV=2	2	4	9	4	1	2845	302.9	6.87	19.86	4	0	2.57286e+07	1.1424e+07	3.47119e+06	NA	4.36684e+06	1.09713e+06	1.2296e+07	NA	5.91998e+06	0.75	1.35413e+07	0.75	2.28739	0.356092
P00338	LDHA	L-lactate dehydrogenase A chain OS=Homo sapiens OX=9606 GN=LDHA PE=1 SV=2	20	5	20	4	1	332	36.7	8.27	45.23	5	1	2.62016e+07	7.35272e+06	2.14715e+07	1.2304e+07	1.84658e+07	1.38568e+07	4.35922e+06	7.56709e+06	1.10622e+07	1	1.68325e+07	1	1.52162	0.31961
P61626	LYZ	Lysozyme C OS=Homo sapiens OX=9606 GN=LYZ PE=1 SV=1	18	3	13	3	1	148	16.5	9.16	31.18	3	0	2.72502e+07	2.03653e+07	5.51071e+07	4.75146e+07	37673862	2.81491e+07	3.09193e+07	3.98063e+07	3.41371e+07	1	3.75593e+07	1	1.10025	0.706361
P08709	F7	Coagulation factor VII OS=Homo sapiens OX=9606 GN=F7 PE=1 SV=1	5	2	4	2	1	466	51.6	7.23	5.43	2	0	2.90372e+07	5.1039e+07	3.95457e+07	2.10674e+07	11767572	2.45578e+07	2.00558e+06	1.19978e+07	1.25822e+07	1	3.51723e+07	1	2.79541	0.0298944
A2NB45	#N/A	Cold agglutinin FS-1 L-chain (Fragment) OS=Homo sapiens OX=9606 PE=2 SV=1	39	3	13	3	1	113	12.4	8.48	35.72	3	0	2.94216e+07	4.90348e+06	4.93766e+07	5.50125e+07	6.19465e+07	4.5707e+07	1.94375e+07	9.46577e+07	5.54372e+07	1	3.46786e+07	1	0.625547	0.325683
A0A075B6R9	IGKV2D-24	Immunoglobulin kappa variable 2D-24 (non-functional) (Fragment) OS=Homo sapiens OX=9606 GN=IGKV2D-24 PE=4 SV=1	17	2	6	2	1	120	13.1	8.87	14.15	2	0	2.96581e+07	NA	5.37025e+07	5.49138e+07	33491115	2.76295e+07	6.48167e+06	1.24812e+08	4.81035e+07	1	4.60915e+07	0.75	0.958173	0.951967
Q76LX8	ADAMTS13	A disintegrin and metalloproteinase with thrombospondin motifs 13 OS=Homo sapiens OX=9606 GN=ADAMTS13 PE=1 SV=1	8	10	35	10	1	1427	153.5	7.17	71.87	10	0	3.02564e+07	3.43295e+07	2.9185e+07	2.06232e+07	3.07452e+07	4.85051e+07	4.1609e+07	1.38864e+07	3.36864e+07	1	2.85985e+07	1	0.848963	0.551898
B2R4F9	#N/A	cDNA, FLJ92074, highly similar to Homo sapiens progestagen-associated endometrial protein (placentalprotein 14, pregnancy-associated endometrial alpha-2-globulin,alpha uterine protein) (PAEP), mRNA OS=Homo sapiens OX=9606 PE=2 SV=1	19	3	4	3	1	162	18.9	5.86	5.98	3	0	3.11336e+07	NA	9.18225e+06	NA	25019122	7.0314e+06	NA	4.84321e+06	1.22979e+07	0.75	2.01579e+07	0.5	1.63913	0.547248
Q8WW79	SELL	L-selectin OS=Homo sapiens OX=9606 GN=SELL PE=2 SV=1	17	5	27	5	1	375	42.4	6.6	55.55	5	0	3.12581e+07	1.66176e+07	2.52726e+07	3.03091e+07	62231145	4.50358e+07	7.40013e+07	3.20585e+07	5.33317e+07	1	2.58644e+07	1	0.484972	0.0315493
Q13201	MMRN1	Multimerin-1 OS=Homo sapiens OX=9606 GN=MMRN1 PE=1 SV=3	7	8	22	8	1	1228	138	7.93	44.54	8	0	3.19786e+07	4.26517e+07	4.47021e+07	3.50737e+07	3.71294e+07	3.9337e+07	6.1973e+07	1.12062e+07	3.74114e+07	1	3.86015e+07	1	1.03181	0.915965
D3YTG3	ABI3BP	Target of Nesh-SH3 OS=Homo sapiens OX=9606 GN=ABI3BP PE=1 SV=1	2	3	7	3	1	1777	195.2	9.73	16.4	3	0	3.2146e+07	NA	2.35999e+06	NA	4262896	2.21203e+07	NA	5.84148e+06	1.07416e+07	0.75	1.7253e+07	0.5	1.60619	0.658541
Q59ED3	#N/A	Intercellular adhesion molecule 2 variant (Fragment) OS=Homo sapiens OX=9606 PE=2 SV=1	6	2	6	2	1	344	38.4	7.78	8.99	2	0	3.29008e+07	1.61701e+07	1.0488e+07	1.35358e+07	2.36397e+07	2.18196e+07	3.91687e+07	2.68053e+07	2.78583e+07	1	1.82737e+07	1	0.655949	0.18227
D3DX01	ABP1	Amine oxidase OS=Homo sapiens OX=9606 GN=ABP1 PE=3 SV=1	14	10	56	10	1	751	85.3	7.09	129.53	10	0	3.34717e+07	6.26517e+07	6.50105e+07	3.2558e+07	24036383	8.50234e+07	6.82408e+07	7.25486e+07	6.24623e+07	1	4.8423e+07	1	0.775235	0.414097
P07359	GP1BA	Platelet glycoprotein Ib alpha chain OS=Homo sapiens OX=9606 GN=GP1BA PE=1 SV=2	14	8	69	1	1	652	71.5	6.29	147.63	8	0	3.38472e+07	3.13315e+07	4.42451e+07	4.24933e+06	2.42922e+07	4.77633e+06	2.97876e+07	1.00782e+07	1.72336e+07	1	2.84183e+07	1	1.64901	0.321524
Q96CF2	CHMP4C	Charged multivesicular body protein 4c OS=Homo sapiens OX=9606 GN=CHMP4C PE=1 SV=1	3	1	6	1	1	233	26.4	6.07	13.53	1	0	3.42321e+07	3.26112e+07	NA	3.72565e+07	37422280	4.11011e+07	4.64109e+07	2.58946e+07	3.77072e+07	1	3.46999e+07	0.75	0.920247	0.592898
O00391	QSOX1	Sulfhydryl oxidase 1 OS=Homo sapiens OX=9606 GN=QSOX1 PE=1 SV=3	12	7	28	7	1	747	82.5	8.92	69.85	7	0	3.46027e+07	6.03829e+07	7.30127e+07	2.68134e+07	3.92e+07	4.03642e+07	2.86547e+07	3.74221e+07	3.64102e+07	1	4.87029e+07	1	1.33762	0.312213
Q6P988	NOTUM	Palmitoleoyl-protein carboxylesterase NOTUM OS=Homo sapiens OX=9606 GN=NOTUM PE=1 SV=2	13	6	24	6	1	496	55.7	7.55	65.14	6	0	3.4797e+07	6.09387e+07	1.79407e+08	1.50293e+07	5.93337e+07	2.16585e+07	5.55365e+07	2.67603e+07	4.08223e+07	1	7.2543e+07	1	1.77705	0.436868
P07195	LDHB	L-lactate dehydrogenase B chain OS=Homo sapiens OX=9606 GN=LDHB PE=1 SV=2	22	5	24	4	1	334	36.6	6.05	40.17	5	0	3.49474e+07	1.16095e+08	8.1827e+07	6.8361e+06	2.33015e+07	9.81245e+07	135848316	4.78489e+07	7.62808e+07	1	5.99265e+07	1	0.785604	0.656987
Q15166	PON3	Serum paraoxonase/lactonase 3 OS=Homo sapiens OX=9606 GN=PON3 PE=1 SV=3	13	4	25	3	1	354	39.6	5.41	59.96	4	0	3.51433e+07	NA	2.46758e+07	NA	10906199	2.82177e+07	8.51496e+06	8.04009e+06	1.39197e+07	1	2.99095e+07	0.5	2.14871	0.112676
Q8NF17	FLJ00385	FLJ00385 protein (Fragment) OS=Homo sapiens OX=9606 GN=FLJ00385 PE=1 SV=1	24	9	46	3	1	509	56.1	7.59	111.97	9	2	3.54283e+07	1.15261e+07	9.40116e+07	2.29136e+08	1.66037e+08	122857912	3.42878e+07	1.17826e+08	1.10252e+08	1	9.25254e+07	1	0.839216	0.762164
P32119	PRDX2	Peroxiredoxin-2 OS=Homo sapiens OX=9606 GN=PRDX2 PE=1 SV=5	20	4	14	4	1	198	21.9	5.97	15.32	4	0	3.54977e+07	5.89744e+07	6.63707e+06	2.1966e+06	8471100	1.97075e+06	3.36959e+06	2.31471e+07	9.23964e+06	1	2.58265e+07	1	2.79518	0.285322
B3KQF4	#N/A	cDNA FLJ90373 fis, clone NT2RP2004606, highly similar to Metalloproteinase inhibitor 1 OS=Homo sapiens OX=9606 PE=2 SV=1	14	3	10	3	1	207	23.2	8.1	25.23	3	0	3.56326e+07	5.04574e+07	3.27352e+07	2.7893e+07	7.92859e+07	4.22041e+07	4.88375e+07	1.79808e+07	4.70771e+07	1	3.66796e+07	1	0.779139	0.471146
P0DOX2	#N/A	Immunoglobulin alpha-2 heavy chain OS=Homo sapiens OX=9606 PE=1 SV=2	14	7	51	1	1	455	48.9	6.67	128.34	7	1	3.64244e+07	8.85893e+06	4.08444e+07	3.03773e+07	8.18502e+06	3.96028e+07	1.48367e+07	2.9962e+07	2.31466e+07	1	2.91263e+07	1	1.25834	0.573749
A0A087WVC6	PTPRJ	Receptor-type tyrosine-protein phosphatase eta OS=Homo sapiens OX=9606 GN=PTPRJ PE=1 SV=1	1	2	16	2	1	1342	146.5	5.62	33.35	2	0	3.76996e+07	2.72701e+07	2.37531e+07	1.60896e+07	27246563	4.44148e+07	4.45677e+07	1.97177e+07	3.39867e+07	1	2.62031e+07	1	0.770981	0.351052
P05019	IGF1	Insulin-like growth factor I OS=Homo sapiens OX=9606 GN=IGF1 PE=1 SV=1	22	3	33	3	1	195	21.8	9.72	110.2	3	0	4.22806e+07	2.30395e+07	1.14477e+08	1.05662e+08	1.36461e+08	6.58866e+07	1.34694e+08	6.33741e+07	1.00104e+08	1	7.13647e+07	1	0.712906	0.384243
P18428	LBP	Lipopolysaccharide-binding protein OS=Homo sapiens OX=9606 GN=LBP PE=1 SV=3	6	3	14	3	1	481	53.4	6.7	29.19	3	0	4.24742e+07	2.63026e+07	5.79649e+06	6.21373e+07	9.27812e+07	7.64084e+07	1.2381e+07	359106	4.54824e+07	1	3.41776e+07	1	0.751447	0.677643
Q6MZL2	DKFZp686M0562	Uncharacterized protein DKFZp686M0562 (Fragment) OS=Homo sapiens OX=9606 GN=DKFZp686M0562 PE=2 SV=1	10	3	12	3	1	321	35.1	5.97	16.84	3	0	4.36947e+07	2.73071e+07	1.98455e+07	2.0763e+07	6548997	1.63804e+07	2.67781e+07	8.72365e+06	1.46078e+07	1	2.79026e+07	1	1.91012	0.11302
P33908	MAN1A1	Mannosyl-oligosaccharide 1,2-alpha-mannosidase IA OS=Homo sapiens OX=9606 GN=MAN1A1 PE=1 SV=3	10	6	25	6	1	653	72.9	6.47	38.81	6	0	4.57224e+07	4.35699e+07	4.44367e+07	2.47555e+07	2.27333e+07	6.67943e+07	2.00771e+07	2.4631e+07	3.35589e+07	1	3.96211e+07	1	1.18064	0.636399
P81605	DCD	Dermcidin OS=Homo sapiens OX=9606 GN=DCD PE=1 SV=2	7	1	1	1	1	110	11.3	6.54	3.11	1	0	4.75964e+07	3.07308e+07	NA	NA	NA	NA	3.2411e+07	4.75515e+07	3.99813e+07	0.5	3.91636e+07	0.5	0.979549	0.949047
B2RA39	#N/A	cDNA, FLJ94686, highly similar to Homo sapiens complement factor H-related 5 (CFHL5), mRNA OS=Homo sapiens OX=9606 PE=2 SV=1	17	9	48	8	1	569	64.3	7.06	99.91	9	0	4.9879e+07	7.76588e+07	3.33308e+07	4.53651e+07	7.41106e+07	5.36977e+07	2.11381e+07	3.11775e+07	4.5031e+07	1	5.15584e+07	1	1.14495	0.680753
E0D851	GP1BA	Platelet glycoprotein Ib alpha OS=Homo sapiens OX=9606 GN=GP1BA PE=4 SV=1	13	8	48	1	1	665	72.8	6.09	110.98	8	6	5.00911e+07	1.57348e+08	7.57773e+07	1.97258e+07	1.32697e+08	6.11525e+07	6.3745e+07	2.97111e+07	7.18264e+07	1	7.57356e+07	1	1.05443	0.918519
B7Z544	#N/A	cDNA FLJ51742, highly similar to Inter-alpha-trypsin inhibitor heavy chain H4 OS=Homo sapiens OX=9606 PE=2 SV=1	32	30	374	1	1	888	98.3	6.6	944.49	30	0	5.45492e+07	1.33834e+08	3.07458e+07	3.03116e+07	8955905	9.56613e+07	1.12944e+08	4.52626e+07	6.57058e+07	1	6.236e+07	1	0.94908	0.925061
Q6N093	DKFZp686I04196	Uncharacterized protein DKFZp686I04196 (Fragment) OS=Homo sapiens OX=9606 GN=DKFZp686I04196 PE=2 SV=1	27	9	46	4	1	417	46	7.59	108.21	9	0	5.67978e+07	2.0701e+07	9.14662e+07	114983397	262083314	6.88445e+07	1.00546e+08	9.73443e+07	1.32204e+08	1	7.09871e+07	1	0.536949	0.253404
W0UV93	RAC1	Ribonuclease A C1 OS=Homo sapiens OX=9606 GN=RAC1 PE=3 SV=1	25	3	9	3	1	156	17.6	8.79	27.69	3	0	5.87224e+07	NA	1.79875e+07	1.10703e+07	14667015	4.02297e+07	1.27341e+07	2.85907e+07	2.40554e+07	1	2.92601e+07	0.75	1.21636	0.735847
A0A3B3IQ51	CFHR2	Complement factor H-related protein 2 OS=Homo sapiens OX=9606 GN=CFHR2 PE=4 SV=1	24	8	58	5	1	355	39.4	6.65	127.23	8	0	5.9099e+07	6.92421e+07	1.0177e+08	1.76431e+08	89503316	5.24796e+07	1.64553e+08	2.89935e+07	8.38824e+07	1	1.01636e+08	1	1.21164	0.671062
P35916	FLT4	Vascular endothelial growth factor receptor 3 OS=Homo sapiens OX=9606 GN=FLT4 PE=1 SV=3	4	5	12	5	1	1363	152.7	6.3	32.76	5	0	6.07202e+07	1.31931e+07	1.02379e+07	5.05519e+06	12282048	2.93941e+07	8.29148e+06	4.48958e+07	2.37159e+07	1	2.23016e+07	1	0.940366	0.929885
O00533	CHL1	Neural cell adhesion molecule L1-like protein OS=Homo sapiens OX=9606 GN=CHL1 PE=1 SV=4	9	9	32	9	1	1208	135	5.76	66.32	9	0	6.12362e+07	1.55841e+07	2.25192e+07	2.4928e+07	5.42896e+07	4.14722e+07	4.24353e+07	3.77142e+07	4.39779e+07	1	3.10669e+07	1	0.706421	0.279349
B0YJC6	PROZ	Vitamin K-dependent protein Z variant 1 OS=Homo sapiens OX=9606 GN=PROZ PE=3 SV=1	32	12	76	12	1	421	46.9	6.04	179.67	12	0	6.4002e+07	1.70636e+08	1.82719e+08	1.36438e+08	83088016	7.03275e+07	1.1164e+08	3.72339e+07	7.55724e+07	1	1.38449e+08	1	1.832	0.087414
A8K5T0	#N/A	cDNA FLJ75416, highly similar to Homo sapiens complement factor H (CFH), mRNA OS=Homo sapiens OX=9606 PE=2 SV=1	57	71	836	1	1	1231	138.9	6.71	2176.1	71	0	6.46497e+07	NA	3.11659e+08	NA	NA	4.32646e+07	1.42994e+08	116256126	1.00838e+08	0.75	1.88154e+08	0.5	1.8659	0.44591
Q59EA3	#N/A	Cadherin 5, type 2 preproprotein variant (Fragment) OS=Homo sapiens OX=9606 PE=2 SV=1	13	9	25	9	1	807	89.9	5.48	61.67	9	0	6.60025e+07	3.36175e+07	7.52612e+07	8.12657e+07	9.18312e+07	1.19137e+08	1.24025e+08	3.17549e+07	9.16871e+07	1	6.40367e+07	1	0.698427	0.2877
A0A024R433	IGFBP5	Insulin-like growth factor binding protein 5, isoform CRA_a OS=Homo sapiens OX=9606 GN=IGFBP5 PE=4 SV=1	13	4	10	4	1	272	30.6	8.21	22.16	4	0	6.61468e+07	NA	5.1681e+07	3.75234e+07	17800756	1.89174e+07	5.22735e+07	5.33463e+07	3.55845e+07	1	5.17837e+07	0.75	1.45523	0.288722
P01624	IGKV3-15	Immunoglobulin kappa variable 3-15 OS=Homo sapiens OX=9606 GN=IGKV3-15 PE=1 SV=2	26	2	16	1	1	115	12.5	5.19	40.03	2	0	6.87966e+07	5.00846e+07	2.70687e+07	3.97612e+07	50066216	2.60093e+07	9.79481e+07	4.30219e+07	5.42614e+07	1	4.64278e+07	1	0.855632	0.674547
M9MML0	FCGR3A	Low affinity immunoglobulin gamma Fc region receptor III-A OS=Homo sapiens OX=9606 GN=FCGR3A PE=4 SV=2	8	3	21	3	1	359	40.2	7.4	45.23	3	0	7.24177e+07	2.32014e+07	3.61365e+07	3.59713e+07	47492483	3.90657e+07	5.42329e+07	3.88932e+07	4.49211e+07	1	4.19317e+07	1	0.933453	0.798997
A0A087WYZ4	CGA	Glycoprotein hormones alpha chain OS=Homo sapiens OX=9606 GN=CGA PE=1 SV=1	10	2	6	2	1	147	16.3	8.47	15.36	2	0	7.40012e+07	3.02475e+07	8.3519e+07	2.73223e+07	NA	1.00457e+08	3.83855e+07	3.08176e+08	1.49006e+08	0.75	5.37725e+07	1	0.360874	0.234063
A6XNE2	#N/A	Complement factor D preproprotein OS=Homo sapiens OX=9606 PE=2 SV=1	35	9	30	9	1	260	27.8	7.25	77.56	9	0	7.41637e+07	2.51532e+08	2.2377e+07	1.63709e+07	92716941	4.70607e+07	1.60404e+08	NA	1.00061e+08	0.75	9.11108e+07	1	0.910557	0.904192
A0A1U9X8W4	#N/A	C2 OS=Homo sapiens OX=9606 PE=3 SV=1	32	24	186	3	1	752	83.3	7.42	495.82	24	0	7.82886e+07	1797792709	1795507881	1291044230	1174822565	8.11689e+08	4.51299e+07	5.00926e+08	6.33142e+08	1	1240658352	1	1.95953	0.244456
B4E1C2	KNG1	Kininogen 1, isoform CRA_b OS=Homo sapiens OX=9606 GN=KNG1 PE=2 SV=1	41	39	695	5	1	644	71.9	6.81	1512.73	39	0	7.83118e+07	123347455	1.33024e+08	2.47781e+08	172322788	1.60717e+08	3.41121e+08	2.18207e+08	2.23092e+08	1	1.45616e+08	1	0.652718	0.207194
B5MCE1	PSG6	Pregnancy-specific beta-1-glycoprotein 6 OS=Homo sapiens OX=9606 GN=PSG6 PE=1 SV=1	20	7	108	1	1	331	36.6	7.77	215.48	7	0	7.85716e+07	1.1482e+07	1.78941e+07	2.77877e+07	13040948	1.40346e+08	5.33117e+07	4.25275e+07	6.23065e+07	1	3.39338e+07	1	0.544627	0.400088
V9HWE3	HEL-S-11	Carbonic anhydrase I, isoform CRA_a OS=Homo sapiens OX=9606 GN=HEL-S-11 PE=2 SV=1	28	6	23	6	1	261	28.9	7.12	59.45	6	0	7.91527e+07	120555293	1.86904e+07	3.47602e+06	36376183	5.20427e+06	1.75293e+07	4.62502e+07	2.634e+07	1	5.54686e+07	1	2.10587	0.349083
M0R1G9	PSG5	Pregnancy-specific beta-1-glycoprotein 5 OS=Homo sapiens OX=9606 GN=PSG5 PE=1 SV=1	22	11	109	1	1	428	48	8.56	251.34	11	2	8.01057e+07	2.48502e+06	1.9403e+07	5.80252e+07	1.00424e+07	1.24831e+08	5.15369e+07	8.95574e+07	6.89919e+07	1	4.00047e+07	1	0.579847	0.377056
Q13103	SPP2	Secreted phosphoprotein 24 OS=Homo sapiens OX=9606 GN=SPP2 PE=1 SV=1	11	2	13	2	1	211	24.3	8.32	30.6	2	0	8.24635e+07	6.89066e+07	8.15689e+06	2.50253e+07	30668137	1.39941e+07	5.97649e+07	680818	2.6277e+07	1	4.61381e+07	1	1.75583	0.396226
A0A024RDA0	KIT	Mast/stem cell growth factor receptor OS=Homo sapiens OX=9606 GN=KIT PE=3 SV=1	2	2	3	2	1	976	109.8	6.98	1.68	2	0	8.32901e+07	686621085	2.77908e+07	2.86005e+07	46073548	2.34153e+08	2.62191e+07	5.11167e+07	8.93905e+07	1	2.06576e+08	1	2.31093	0.510909
P02787	TF	Serotransferrin OS=Homo sapiens OX=9606 GN=TF PE=1 SV=3	63	64	1080	1	1	698	77	7.12	2715.16	64	0	8.50068e+07	259755172	3319855315	1530617594	784862768	3.86055e+08	9.7865e+08	8.64929e+08	7.53624e+08	1	1298808714	1	1.72342	0.498905
P08833	IGFBP1	Insulin-like growth factor-binding protein 1 OS=Homo sapiens OX=9606 GN=IGFBP1 PE=1 SV=1	24	5	24	5	1	259	27.9	5.19	63.37	5	0	8.58436e+07	7.80101e+07	3.47116e+07	7.24816e+06	3.21437e+06	3.28029e+07	6.77189e+06	2.09734e+07	1.59406e+07	1	5.14534e+07	1	3.22781	0.122183
Q86VB7	CD163	Scavenger receptor cysteine-rich type 1 protein M130 OS=Homo sapiens OX=9606 GN=CD163 PE=1 SV=2	14	15	47	15	1	1156	125.4	5.95	100.2	15	0	8.72104e+07	1.17101e+07	1.03351e+07	3.75331e+07	114988234	2.02397e+08	1.45413e+08	2.95221e+07	123079917	1	3.66972e+07	1	0.298157	0.0757319
Q15228	#N/A	Pregnancy-specific beta-1 glycoprotein (Fragment) OS=Homo sapiens OX=9606 PE=4 SV=1	19	9	105	1	1	411	46.2	8.28	241.04	9	0	8.79559e+07	NA	NA	1.22246e+07	NA	1.84656e+08	NA	4.89114e+07	116783795	0.5	5.00902e+07	0.5	0.428914	0.481246
A0A0C4DG49	PVR	Poliovirus receptor OS=Homo sapiens OX=9606 GN=PVR PE=1 SV=1	11	3	15	3	1	417	45.3	6.52	39.85	3	0	8.8549e+07	9.78346e+07	1.92748e+07	3.31541e+07	128270394	154277567	1.02688e+08	7.80568e+07	1.15823e+08	1	5.97031e+07	1	0.515467	0.0707727
O75636	FCN3	Ficolin-3 OS=Homo sapiens OX=9606 GN=FCN3 PE=1 SV=2	28	9	80	9	1	299	32.9	6.67	194.36	9	0	8.87225e+07	1.95834e+08	3.77659e+08	2.60112e+08	2.88315e+08	4.46918e+08	2.93461e+08	5.58505e+08	3.96799e+08	1	2.30582e+08	1	0.581105	0.110882
V9HWB4	HEL-S-89n	Epididymis secretory sperm binding protein Li 89n OS=Homo sapiens OX=9606 GN=HEL-S-89n PE=2 SV=1	29	15	45	14	1	654	72.3	5.16	119.52	15	1	9.08916e+07	8.70781e+07	4.06131e+07	3.39551e+07	7.7866e+07	8.32295e+07	8.74528e+07	2.47629e+07	6.83278e+07	1	6.31345e+07	1	0.923994	0.812697
B2RAK1	#N/A	cDNA, FLJ94965, highly similar to Homo sapiens leucyl/cystinyl aminopeptidase (LNPEP), mRNA OS=Homo sapiens OX=9606 PE=2 SV=1	7	8	54	8	1	1025	117.3	5.73	90.88	8	0	9.39535e+07	5.29768e+07	5.78407e+07	1.01314e+08	2.14664e+07	5.09593e+07	8.51666e+07	1.16914e+08	6.86266e+07	1	7.65211e+07	1	1.11504	0.754254
P35908	KRT2	Keratin, type II cytoskeletal 2 epidermal OS=Homo sapiens OX=9606 GN=KRT2 PE=1 SV=2	23	13	36	8	1	639	65.4	8	83.52	13	3	9.56087e+07	3.45821e+07	5.66744e+07	7.8038e+07	1.86387e+07	108327636	5.52187e+07	1.52535e+08	8.36801e+07	1	6.62258e+07	1	0.791416	0.607902
P41222	PTGDS	Prostaglandin-H2 D-isomerase OS=Homo sapiens OX=9606 GN=PTGDS PE=1 SV=1	25	4	27	4	1	190	21	7.8	57.99	4	0	1.00418e+08	6.30667e+07	6.50334e+07	2.28438e+07	65461526	8.54843e+07	6.90756e+07	2.50801e+07	6.12754e+07	1	6.28406e+07	1	1.02554	0.941322
J3KNB4	CAMP	Cathelicidin antimicrobial peptide OS=Homo sapiens OX=9606 GN=CAMP PE=1 SV=1	23	4	12	4	1	173	19.6	9.41	31.09	4	0	1.06161e+08	1.57595e+07	2.56803e+07	9.53432e+06	50876520	1.19451e+07	3.8777e+07	7.24322e+06	2.72105e+07	1	3.92837e+07	1	1.4437	0.644557
Q92496	CFHR4	Complement factor H-related protein 4 OS=Homo sapiens OX=9606 GN=CFHR4 PE=1 SV=3	17	9	46	4	1	578	65.3	4.94	107.47	9	4	1.06786e+08	2.20024e+08	5.54939e+07	1.44022e+08	6.40522e+07	1.11236e+08	2.32775e+08	2.76569e+07	1.0893e+08	1	1.31581e+08	1	1.20794	0.702509
A8K3I0	#N/A	cDNA FLJ78437, highly similar to Homo sapiens cartilage oligomeric matrix protein (COMP), mRNA OS=Homo sapiens OX=9606 PE=2 SV=1	18	9	28	8	1	757	82.8	4.59	72.58	9	1	1.14794e+08	6.66818e+07	3.23372e+08	2.85381e+08	8.11954e+07	9.93054e+07	7.99997e+07	6.10995e+07	8.04e+07	1	1.97557e+08	1	2.45718	0.114171
A0A140VK24	#N/A	Testicular secretory protein Li 24 OS=Homo sapiens OX=9606 PE=2 SV=1	13	5	43	5	1	440	49.5	6.11	115.52	5	0	1.15471e+08	1.65694e+08	2.42724e+08	2.07533e+08	148490496	9.03127e+07	1.05497e+08	7.69913e+07	1.05323e+08	1	1.82855e+08	1	1.73614	0.0491185
J3KPA1	CRISP3	Cysteine-rich secretory protein 3 OS=Homo sapiens OX=9606 GN=CRISP3 PE=1 SV=1	11	3	6	3	1	276	31	7.61	16.03	3	0	1.34093e+08	2.55107e+07	NA	3.01202e+07	NA	4.22652e+07	4.66296e+07	5.27093e+07	4.72014e+07	0.75	6.32413e+07	0.75	1.33982	0.675481
Q04756	HGFAC	Hepatocyte growth factor activator OS=Homo sapiens OX=9606 GN=HGFAC PE=1 SV=1	27	15	65	15	1	655	70.6	7.24	169.47	15	0	1.34712e+08	1.55586e+08	1.33943e+08	1.43365e+08	1.45425e+08	120469444	226100045	1.13564e+08	1.5139e+08	1	1.41901e+08	1	0.937326	0.730759
Q2L9S7	AAT	Alpha-1-antitrypsin MBrescia variant (Fragment) OS=Homo sapiens OX=9606 GN=AAT PE=3 SV=1	79	9	106	2	1	89	10.7	6.16	279.42	9	0	1.35067e+08	8.50529e+07	1.6194e+08	2.04248e+08	321520720	2.72362e+08	151045500	365087877	2.77504e+08	1	1.46577e+08	1	0.528197	0.0469917
O43866	CD5L	CD5 antigen-like OS=Homo sapiens OX=9606 GN=CD5L PE=1 SV=1	37	10	44	10	1	347	38.1	5.47	97.96	10	0	135585733	2.54743e+07	3.78871e+08	3.93724e+08	142835775	2.28263e+08	5.9405e+07	7.26249e+08	2.89188e+08	1	2.33414e+08	1	0.807135	0.761099
A5YAK2	APOC4	Apolipoprotein C-IV OS=Homo sapiens OX=9606 GN=APOC4 PE=2 SV=1	37	6	36	4	1	127	14.6	9.13	77.35	6	0	1.39085e+08	6.22628e+07	420357529	3.65976e+08	138043178	2.27518e+08	3.02124e+08	8.5578e+07	1.88316e+08	1	2.4692e+08	1	1.3112	0.575394
E7EUF1	ENPP2	Ectonucleotide pyrophosphatase/phosphodiesterase family member 2 OS=Homo sapiens OX=9606 GN=ENPP2 PE=1 SV=1	10	10	54	10	1	884	101.5	7.53	112.36	10	0	1.42829e+08	2.01802e+08	2.18127e+08	2.4379e+08	5.69214e+07	4.37307e+08	1.77216e+08	1.23328e+08	1.98693e+08	1	2.01637e+08	1	1.01482	0.973789
O00187	MASP2	Mannan-binding lectin serine protease 2 OS=Homo sapiens OX=9606 GN=MASP2 PE=1 SV=4	12	8	48	8	1	686	75.7	5.63	116.02	8	0	1.48411e+08	2.65704e+08	1.88432e+08	2.06556e+08	2.26821e+08	2.55204e+08	236409372	182717857	2.25288e+08	1	202275844	1	0.897854	0.455043
P13645	KRT10	Keratin, type I cytoskeletal 10 OS=Homo sapiens OX=9606 GN=KRT10 PE=1 SV=6	26	14	56	11	1	584	58.8	5.21	138.66	14	4	1.5035e+08	1.82169e+08	2.07996e+08	189870729	4.93122e+07	248799804	1.34214e+08	3.52212e+08	1.96135e+08	1	1.82596e+08	1	0.930975	0.847096
B2R815	#N/A	cDNA, FLJ93695, highly similar to Homo sapiens serpin peptidase inhibitor, clade A (alpha-1 antiproteinase, antitrypsin), member 4 (SERPINA4), mRNA OS=Homo sapiens OX=9606 PE=2 SV=1	31	13	85	13	1	427	48.5	7.75	172.55	13	0	1.51464e+08	1.29112e+08	6.50735e+08	5.48138e+08	2.05533e+08	1.14711e+08	1.37401e+08	204187686	1.65458e+08	1	3.69862e+08	1	2.23539	0.184252
P02776	PF4	Platelet factor 4 OS=Homo sapiens OX=9606 GN=PF4 PE=1 SV=2	45	6	66	3	1	101	10.8	8.62	197.76	6	3	1.51913e+08	1292469544	9.6152e+08	4.20595e+08	5.85068e+08	2.09087e+08	615878114	2.96919e+08	426737902	1	7.06624e+08	1	1.65587	0.351781
Q9NQ79	CRTAC1	Cartilage acidic protein 1 OS=Homo sapiens OX=9606 GN=CRTAC1 PE=1 SV=2	9	6	16	6	1	661	71.4	5.12	34.92	6	0	1.55801e+08	6.89511e+07	1.04967e+08	1.68824e+07	18301880	2.39695e+08	120480981	3.04655e+08	1.70783e+08	1	8.66505e+07	1	0.507372	0.274499
Q03591	CFHR1	Complement factor H-related protein 1 OS=Homo sapiens OX=9606 GN=CFHR1 PE=1 SV=2	34	11	102	3	1	330	37.6	7.39	283.85	11	3	1.56177e+08	4.40152e+08	1.88882e+08	4.8752e+08	1.97878e+08	1.85432e+08	1.88568e+08	1.02732e+08	1.68653e+08	1	3.18183e+08	1	1.88662	0.139248
P07333	CSF1R	Macrophage colony-stimulating factor 1 receptor OS=Homo sapiens OX=9606 GN=CSF1R PE=1 SV=2	6	5	39	5	1	972	107.9	6.37	101.07	5	0	1.5634e+08	5.01192e+07	1.24958e+08	1.02163e+08	168193454	1.51394e+08	2.27461e+08	2.264e+08	1.93362e+08	1	1.08395e+08	1	0.560582	0.0291368
A0A0S2Z4F1	EFEMP1	EGF containing fibulin-like extracellular matrix protein 1 isoform 1 (Fragment) OS=Homo sapiens OX=9606 GN=EFEMP1 PE=2 SV=1	26	10	57	10	1	493	54.6	5.07	147.53	10	0	1.56885e+08	1.31043e+08	1.04464e+08	4.95488e+07	6.83349e+07	6.83212e+07	1.24521e+08	4.50906e+07	7.6567e+07	1	1.10485e+08	1	1.44299	0.279044
P20851	C4BPB	C4b-binding protein beta chain OS=Homo sapiens OX=9606 GN=C4BPB PE=1 SV=1	22	5	37	5	1	252	28.3	5.14	78.63	5	0	1.59608e+08	1.93392e+08	4.27089e+08	290990426	2.34569e+08	2.28892e+08	1.05384e+08	2.88034e+08	2.1422e+08	1	2.6777e+08	1	1.24998	0.481276
B4DPQ3	#N/A	cDNA FLJ51034, highly similar to Vitamin K-dependent protein C OS=Homo sapiens OX=9606 PE=2 SV=1	18	8	51	8	1	517	57.4	7.53	133.41	8	0	1.60603e+08	1.65272e+08	1.35946e+08	1.31886e+08	1.70923e+08	1.53962e+08	155187444	1.55594e+07	1.23908e+08	1	1.48427e+08	1	1.19788	0.535321
A0A1K0GXZ1	GLNC1	Globin C1 OS=Homo sapiens OX=9606 GN=GLNC1 PE=3 SV=1	28	4	52	4	1	177	19.2	9.77	142.79	4	0	1.61734e+08	1444191336	2.30538e+08	2.15237e+08	239272869	8.2193e+07	1.18496e+08	7.46522e+08	2.96621e+08	1	5.12925e+08	1	1.72923	0.555652
P16070	CD44	CD44 antigen OS=Homo sapiens OX=9606 GN=CD44 PE=1 SV=3	4	3	16	3	1	742	81.5	5.33	33.14	3	0	170182941	2.83464e+07	2.18204e+07	3.44555e+07	25944816	8.66528e+07	9.47707e+07	4.30515e+07	6.2605e+07	1	6.37013e+07	1	1.01751	0.978651
B2R888	#N/A	Monocyte differentiation antigen CD14 OS=Homo sapiens OX=9606 PE=2 SV=1	20	7	31	7	1	375	40	6.23	67.49	7	0	1.74746e+08	144482692	9.71034e+07	1.30108e+08	1.76903e+08	2.5605e+08	1.04164e+08	1.20323e+08	1.6436e+08	1	1.3661e+08	1	0.831164	0.491768
P22352	GPX3	Glutathione peroxidase 3 OS=Homo sapiens OX=9606 GN=GPX3 PE=1 SV=2	27	6	79	6	1	226	25.5	8.13	151.92	6	0	175993511	2.81864e+08	3.91022e+08	210944802	3.13827e+08	217611458	3.04773e+08	2.35591e+08	2.6795e+08	1	2.64956e+08	1	0.988825	0.956999
P07686	HEXB	Beta-hexosaminidase subunit beta OS=Homo sapiens OX=9606 GN=HEXB PE=1 SV=3	6	3	9	3	1	556	63.1	6.76	14.89	3	0	177265451	5.09433e+08	3.0371e+08	9.86408e+08	163957320	152038081	6.53359e+07	303263566	1.71149e+08	1	4.94204e+08	1	2.88757	0.130444
P35527	KRT9	Keratin, type I cytoskeletal 9 OS=Homo sapiens OX=9606 GN=KRT9 PE=1 SV=3	20	11	46	10	1	623	62	5.24	109.86	11	0	1.81879e+08	2.07114e+08	7.59123e+07	2.31153e+08	5.07512e+07	3.45564e+08	1.52087e+08	5.08872e+08	2.64319e+08	1	1.74014e+08	1	0.65835	0.433055
M0R276	PSG11	Pregnancy-specific beta-1-glycoprotein 11 (Fragment) OS=Homo sapiens OX=9606 GN=PSG11 PE=1 SV=1	30	11	68	1	1	320	36	8.54	154.05	11	3	1.88866e+08	9.06271e+07	1.01079e+08	8.41377e+06	5730756	1.88152e+08	8.41106e+07	2.45065e+07	75625007	1	9.72463e+07	1	1.2859	0.708865
A0A140VJI7	#N/A	Testicular tissue protein Li 61 OS=Homo sapiens OX=9606 PE=2 SV=1	23	11	51	11	1	540	60.6	6.71	134.33	11	0	2.05e+08	1.43128e+08	2.43202e+07	1.23405e+08	5.92623e+07	1.18641e+08	1.07829e+08	8.25359e+07	9.20671e+07	1	1.23963e+08	1	1.34645	0.453185
P03951	F11	Coagulation factor XI OS=Homo sapiens OX=9606 GN=F11 PE=1 SV=1	30	17	71	17	1	625	70.1	8.1	152.61	17	0	2.08906e+08	1.33571e+08	1.18531e+08	2.95396e+08	5.47343e+08	3.03642e+08	1.98862e+08	2.76477e+08	3.31581e+08	1	1.89101e+08	1	0.5703	0.146707
Q9UQ74	PSG8	Pregnancy-specific beta-1-glycoprotein 8 OS=Homo sapiens OX=9606 GN=PSG8 PE=2 SV=2	25	12	164	1	1	426	47.7	8.78	335.62	12	1	2.10111e+08	2.21819e+08	8.98805e+07	9.09127e+07	4.59471e+08	2.45084e+08	4.61988e+08	1.06226e+08	3.18192e+08	1	1.53181e+08	1	0.481409	0.130773
O75238	PSG1	PSG IIA-d OS=Homo sapiens OX=9606 GN=PSG1 PE=4 SV=1	27	9	173	1	1	333	37	7.8	359.39	9	1	2.12285e+08	1.67565e+07	5.40304e+07	3.11722e+07	6.12827e+07	1.85134e+08	1.47865e+08	9.1041e+07	1.21331e+08	1	7.85611e+07	1	0.647496	0.451368
P19320	VCAM1	Vascular cell adhesion protein 1 OS=Homo sapiens OX=9606 GN=VCAM1 PE=1 SV=1	14	10	38	10	1	739	81.2	5.22	94.34	10	0	2.14172e+08	6.52292e+07	4.43842e+07	1.34624e+07	8.12564e+07	1.01091e+08	5.25216e+07	3.25612e+07	6.68576e+07	1	8.43121e+07	1	1.26107	0.72359
P11465	PSG2	Pregnancy-specific beta-1-glycoprotein 2 OS=Homo sapiens OX=9606 GN=PSG2 PE=2 SV=2	29	8	83	3	1	335	37.2	7.8	194.56	8	0	2.36102e+08	5.34511e+07	8.3618e+06	8.19389e+07	1.67075e+07	3.55265e+08	7.98885e+07	5.25452e+07	1.26102e+08	1	9.49635e+07	1	0.753071	0.746278
B7Z8B6	#N/A	cDNA FLJ54395, highly similar to Inter-alpha-trypsin inhibitor heavy chain H1 OS=Homo sapiens OX=9606 PE=2 SV=1	27	13	148	2	1	623	69.5	6.16	490.3	13	0	2.57158e+08	NA	8.33841e+07	1.07322e+08	93748832	NA	NA	NA	93748832	0.25	1.49288e+08	0.75	1.59242	NA
P02741	CRP	C-reactive protein OS=Homo sapiens OX=9606 GN=CRP PE=1 SV=1	12	3	32	3	1	224	25	5.63	84.3	3	0	2.577e+08	4.94781e+08	4.0738e+08	1.16785e+08	950703682	7.61824e+08	2.91634e+07	1.46105e+07	439075417	1	3.19162e+08	1	0.726895	0.658223
P01591	JCHAIN	Immunoglobulin J chain OS=Homo sapiens OX=9606 GN=JCHAIN PE=1 SV=4	42	6	44	6	1	159	18.1	5.24	97.2	6	0	2.61365e+08	18668497	3.51967e+08	2.9766e+08	1.89206e+08	2.64739e+08	1.25137e+08	6.30028e+08	3.02277e+08	1	2.32415e+08	1	0.768881	0.622836
Q6UXB8	PI16	Peptidase inhibitor 16 OS=Homo sapiens OX=9606 GN=PI16 PE=1 SV=1	11	5	24	1	1	463	49.4	5.39	55.28	5	4	2.76266e+08	3.53916e+07	1.49727e+07	6.19718e+07	105513349	1.37417e+08	1.58697e+08	104145987	1.26444e+08	1	9.71505e+07	1	0.768331	0.652788
A8K6C9	#N/A	cDNA FLJ78037, highly similar to Homo sapiens insulin-like growth factor 2 (somatomedin A), mRNA OS=Homo sapiens OX=9606 PE=2 SV=1	20	4	27	3	1	180	20.2	9.32	74.19	4	1	2.95856e+08	167292025	2.49434e+08	1.94341e+08	1.57691e+08	2.51407e+08	1.70559e+08	2.5611e+08	2.08942e+08	1	2.26731e+08	1	1.08514	0.662212
P01034	CST3	Cystatin-C OS=Homo sapiens OX=9606 GN=CST3 PE=1 SV=1	37	5	44	5	1	146	15.8	8.75	110.41	5	0	3.00252e+08	208880966	6.6167e+07	8.66968e+07	285138293	1.98167e+08	2.28215e+08	9.06741e+07	2.00549e+08	1	1.65499e+08	1	0.825232	0.626587
P23142	FBLN1	Fibulin-1 OS=Homo sapiens OX=9606 GN=FBLN1 PE=1 SV=4	20	16	146	5	1	703	77.2	5.22	349.06	16	0	3.05444e+08	1.71429e+08	1.56468e+08	2.14545e+08	7.66233e+07	1.81766e+08	1.44044e+08	7.16693e+07	1.18525e+08	1	2.11972e+08	1	1.78841	0.0721632
P60709	ACTB	Actin, cytoplasmic 1 OS=Homo sapiens OX=9606 GN=ACTB PE=1 SV=1	42	13	95	5	1	375	41.7	5.48	232.16	13	8	3.1076e+08	6.84517e+08	4.746e+08	1.41315e+08	4.70818e+08	5.04297e+08	1.65317e+08	1.8137e+08	3.30451e+08	1	402797859	1	1.21894	0.641025
D3DNN4	BCHE	Carboxylic ester hydrolase OS=Homo sapiens OX=9606 GN=BCHE PE=3 SV=1	12	9	52	9	1	643	72.8	7.55	110.2	9	0	3.20131e+08	211998651	2.30418e+08	2.82914e+08	264613271	1.88264e+08	3.40794e+08	2.17568e+08	2.5281e+08	1	261365419	1	1.03384	0.84324
L8E853	VWF	von Willebrand factor OS=Homo sapiens OX=9606 GN=VWF PE=4 SV=1	28	68	416	1	1	2715	298.2	5.48	1051.02	68	0	320404368	4.2489e+08	7.44674e+07	7.11512e+07	135741456	1.49065e+08	NA	1.10074e+08	1.31627e+08	0.75	222728251	1	1.69212	0.429014
A0A0A0MRJ7	F5	Coagulation factor V OS=Homo sapiens OX=9606 GN=F5 PE=1 SV=1	14	30	163	30	1	2229	252.1	6.05	380.49	30	0	3.22218e+08	4.45498e+08	5.98712e+08	3.29925e+08	350760930	248828966	392314341	2.94212e+08	3.21529e+08	1	4.24088e+08	1	1.31897	0.203826
Q6PIL8	IGK@	IGK@ protein OS=Homo sapiens OX=9606 GN=IGK@ PE=1 SV=1	38	8	70	3	1	236	25.8	6.55	192.56	8	4	3.28458e+08	1.88419e+08	1.459e+08	7.1483e+08	7.43122e+08	8.81803e+08	3.91445e+08	7.97669e+08	7.0351e+08	1	3.44402e+08	1	0.489548	0.0771163
P68871	HBB	Hemoglobin subunit beta OS=Homo sapiens OX=9606 GN=HBB PE=1 SV=2	78	10	72	5	1	147	16	7.28	188.06	10	5	3.38319e+08	2507104862	4.01174e+08	320851066	4.92164e+08	1.08847e+08	2.15331e+08	1372986278	5.47332e+08	1	8.91862e+08	1	1.62947	0.592854
A0A024R930	PRG4	Proteoglycan 4, isoform CRA_a OS=Homo sapiens OX=9606 GN=PRG4 PE=4 SV=1	9	13	38	13	1	1404	151	9.5	73.16	13	0	3.38336e+08	3.76842e+08	5.05702e+08	5.22706e+08	1.91686e+08	3.58411e+08	2.66445e+08	3.7145e+08	2.96998e+08	1	4.35896e+08	1	1.46768	0.0677051
P07996	THBS1	Thrombospondin-1 OS=Homo sapiens OX=9606 GN=THBS1 PE=1 SV=2	25	25	121	25	1	1170	129.3	4.94	328.67	25	0	3.54287e+08	695938871	7.41097e+08	3.96282e+08	5.63748e+08	1.72156e+08	5.43114e+08	2.28384e+08	3.7685e+08	1	5.46901e+08	1	1.45124	0.280038
Q96IY4	CPB2	Carboxypeptidase B2 OS=Homo sapiens OX=9606 GN=CPB2 PE=1 SV=2	32	12	67	12	1	423	48.4	7.71	183.22	12	0	3.64444e+08	4.34894e+08	5.79198e+08	9.38271e+08	746910484	6.01597e+08	5.96766e+08	7.17187e+08	6.65615e+08	1	5.79202e+08	1	0.870175	0.541508
A0A0A0MSD0	SVEP1	Sushi, von Willebrand factor type A, EGF and pentraxin domain-containing protein 1 OS=Homo sapiens OX=9606 GN=SVEP1 PE=1 SV=1	9	28	87	28	1	3574	390.2	5.5	214.5	28	0	3.76327e+08	9.31046e+07	7.94188e+07	1.73532e+08	8.4227e+06	1.10544e+08	43309353	9.28675e+07	6.37858e+07	1	1.80596e+08	1	2.83128	0.157417
Q9NZP8	C1RL	Complement C1r subcomponent-like protein OS=Homo sapiens OX=9606 GN=C1RL PE=1 SV=2	18	8	53	1	1	487	53.5	7.2	129.55	8	5	3.76546e+08	2.9397e+08	2.54925e+08	2.28314e+08	4.99737e+08	4.02709e+08	5.44635e+08	3.70698e+08	4.54445e+08	1	288438860	1	0.634706	0.0187315
Q7Z7Q0	APOB	APOB protein OS=Homo sapiens OX=9606 GN=APOB PE=2 SV=1	55	56	643	1	1	825	92.3	7.42	1612.8	56	0	3.86033e+08	NA	NA	3.18728e+08	NA	NA	NA	1.57767e+08	1.57767e+08	0.25	3.52381e+08	0.5	2.23355	NA
P49908	SELENOP	Selenoprotein P OS=Homo sapiens OX=9606 GN=SELENOP PE=1 SV=3	18	9	55	9	1	381	43.2	7.87	123.42	9	0	3.87449e+08	3.7318e+08	4.6883e+08	3.65422e+08	363506405	3.70924e+08	2.77846e+08	4.56489e+08	3.67192e+08	1	3.9872e+08	1	1.08586	0.496588
S6AWE6	#N/A	IgG L chain OS=Homo sapiens OX=9606 PE=2 SV=1	28	5	79	2	1	215	22.9	8.43	121.61	5	0	3.92308e+08	2.46548e+08	1.3537e+08	142400579	227911326	2.81643e+08	494541138	2.32275e+08	3.09093e+08	1	2.29157e+08	1	0.741386	0.393761
A0A024R2Q7	CLEC3B	C-type lectin domain family 3, member B, isoform CRA_a OS=Homo sapiens OX=9606 GN=CLEC3B PE=4 SV=1	44	6	38	1	1	202	22.5	5.67	98.32	6	4	3.93882e+08	3.42142e+08	1.93802e+08	1.7075e+08	3.73963e+08	4.04471e+08	2.70155e+08	172215262	3.05201e+08	1	2.75144e+08	1	0.901516	0.706729
Q9UNU2	C4B	Complement protein C4B frameshift mutant (Fragment) OS=Homo sapiens OX=9606 GN=C4B PE=4 SV=1	40	12	199	1	1	354	38.1	8.53	624.51	12	0	4.07816e+08	5.83574e+08	4.04719e+08	6.05592e+08	234597232	3.39262e+08	4.71251e+08	7.57301e+08	4.50603e+08	1	5.00425e+08	1	1.11057	0.705296
P07360	C8G	Complement component C8 gamma chain OS=Homo sapiens OX=9606 GN=C8G PE=1 SV=3	46	8	70	8	1	202	22.3	8.31	178.06	8	0	4.29728e+08	2.91743e+08	4.98098e+08	6.52576e+08	825513597	6.91173e+08	6.48273e+08	4.81419e+08	661594807	1	4.68036e+08	1	0.707436	0.109926
A2KBC2	#N/A	Anti-(ED-B) scFV (Fragment) OS=Homo sapiens OX=9606 PE=2 SV=1	33	6	24	1	1	238	25.2	7.71	63.97	6	3	457541618	223912679	1.96152e+08	1.76928e+08	1.57604e+08	1.70567e+08	3.93102e+08	206143084	2.31854e+08	1	2.63633e+08	1	1.13707	0.722083
V9HW68	HEL-214	Epididymis luminal protein 214 OS=Homo sapiens OX=9606 GN=HEL-214 PE=2 SV=1	27	10	45	4	1	470	51.7	7.75	117.25	10	6	4.71329e+08	1.93653e+08	1500092529	1839475242	1257840932	7.83927e+08	7.26786e+08	1158669802	981805788	1	1001137385	1	1.01969	0.964609
Q6PIK1	IGL@	IGL@ protein OS=Homo sapiens OX=9606 GN=IGL@ PE=1 SV=1	39	8	49	1	1	235	24.8	7.71	109.89	8	5	4.73258e+08	2.44621e+08	456515292	908251583	390247266	1018783519	5.68902e+08	1232952519	8.02721e+08	1	5.20661e+08	1	0.64862	0.28384
P48740	MASP1	Mannan-binding lectin serine protease 1 OS=Homo sapiens OX=9606 GN=MASP1 PE=1 SV=3	26	17	87	16	1	699	79.2	5.49	229.15	17	0	4.78949e+08	4.45229e+08	4.05558e+08	2.62481e+08	3.06605e+08	5.39817e+08	2.66472e+08	1.37053e+08	3.12487e+08	1	3.98054e+08	1	1.27383	0.409497
Q96PD5	PGLYRP2	N-acetylmuramoyl-L-alanine amidase OS=Homo sapiens OX=9606 GN=PGLYRP2 PE=1 SV=1	28	13	107	13	1	576	62.2	7.55	332.98	13	0	4.8892e+08	5.45019e+08	9.82017e+08	3.4328e+08	628153904	5.14786e+08	7.8045e+08	5.27673e+08	6.12766e+08	1	5.89809e+08	1	0.962536	0.883804
Q8NBP7	PCSK9	Proprotein convertase subtilisin/kexin type 9 OS=Homo sapiens OX=9606 GN=PCSK9 PE=1 SV=3	11	6	22	6	1	692	74.2	6.61	45.01	6	0	5.24246e+08	2.86476e+08	2.34718e+08	1.67885e+08	4.20826e+08	4.51033e+08	3.32646e+08	1.60108e+08	3.41153e+08	1	303331235	1	0.889135	0.722003
A8K1K1	#N/A	cDNA FLJ76342, highly similar to Homo sapiens carnosine dipeptidase 1 (metallopeptidase M20 family)(CNDP1), mRNA OS=Homo sapiens OX=9606 PE=2 SV=1	28	15	118	15	1	507	56.7	5.36	270.7	15	0	5.29496e+08	9.27717e+08	1424965288	1089090196	1384242478	1010912795	1155623582	888201103	1109744990	1	9.92817e+08	1	0.894635	0.605041
Q9UGM5	FETUB	Fetuin-B OS=Homo sapiens OX=9606 GN=FETUB PE=1 SV=2	36	11	123	11	1	382	42	6.83	253.79	11	0	5.39875e+08	646536846	444705270	7.27601e+08	689319956	9.45573e+08	7.19991e+08	3.97611e+08	6.88123e+08	1	5.8968e+08	1	0.856939	0.471922
A0A0R7FJH5	F12	Coagulation factor XII OS=Homo sapiens OX=9606 GN=F12 PE=3 SV=1	32	18	124	1	1	615	67.8	7.8	339.06	18	15	5.40942e+08	1126143846	1662713278	1342749039	4.28285e+08	1972659660	6.67516e+08	1322699120	1097789948	1	1168137142	1	1.06408	0.872568
P17936	IGFBP3	Insulin-like growth factor-binding protein 3 OS=Homo sapiens OX=9606 GN=IGFBP3 PE=1 SV=2	39	11	98	11	1	291	31.7	8.69	220.61	11	0	5.99038e+08	5.01761e+08	8.43757e+08	8.07165e+08	1046677305	7.04429e+08	9.55227e+08	7.11818e+08	8.54538e+08	1	687930387	1	0.805032	0.212293
F2RM37	F9	Coagulation factor IX OS=Homo sapiens OX=9606 GN=F9 p22 PE=2 SV=1	32	12	86	12	1	461	51.7	5.47	246.96	12	0	7.01088e+08	4.51752e+08	3.37146e+08	5.31627e+08	5.86766e+08	7.45445e+08	6.60027e+08	4.72518e+08	6.16189e+08	1	5.05403e+08	1	0.820208	0.291811
G3XAK1	MST1	Hepatocyte growth factor-like protein OS=Homo sapiens OX=9606 GN=MST1 PE=1 SV=1	36	23	142	11	1	725	81.9	7.8	347.42	23	10	7.04288e+08	5.35746e+08	6.11118e+08	7.96698e+08	871661568	8.56997e+08	7.90979e+08	5.39941e+08	7.64895e+08	1	6.61962e+08	1	0.86543	0.3229
Q6P520	PSG4	Pregnancy specific beta-1-glycoprotein 4 OS=Homo sapiens OX=9606 GN=PSG4 PE=2 SV=1	32	15	177	3	1	419	47.1	9.07	415.74	15	5	7.1067e+08	4.50435e+07	4.91046e+08	4.93202e+08	220372276	1595578313	2.39546e+08	1552195160	9.01923e+08	1	4.34991e+08	1	0.482292	0.300852
B2R8I2	#N/A	cDNA, FLJ93914, highly similar to Homo sapiens histidine-rich glycoprotein (HRG), mRNA OS=Homo sapiens OX=9606 PE=2 SV=1	30	15	110	1	1	525	59.5	7.44	284.32	15	13	7.17396e+08	2927979906	6.16701e+08	4.68834e+08	3.72153e+08	5.63336e+08	7.19626e+08	8.65419e+08	6.30133e+08	1	1182727897	1	1.87695	0.38774
P02745	C1QA	Complement C1q subcomponent subunit A OS=Homo sapiens OX=9606 GN=C1QA PE=1 SV=2	9	3	28	3	1	245	26	9.11	74.66	3	0	7.53359e+08	2.41937e+08	7.3964e+08	5.46749e+08	857666392	6.85676e+08	655609992	5.64587e+08	6.90885e+08	1	5.70421e+08	1	0.825639	0.40343
P27918	CFP	Properdin OS=Homo sapiens OX=9606 GN=CFP PE=1 SV=2	26	10	75	10	1	469	51.2	7.9	222.09	10	0	7.80443e+08	3.25018e+08	3.94981e+08	4.66042e+08	765061651	8.1957e+08	9.91919e+08	4.93214e+08	7.67441e+08	1	4.91621e+08	1	0.640598	0.104285
P19652	ORM2	Alpha-1-acid glycoprotein 2 OS=Homo sapiens OX=9606 GN=ORM2 PE=1 SV=2	33	11	102	5	1	201	23.6	5.11	254.38	11	6	7.86782e+08	1053372530	5827871400	5122394472	2715456597	1420511368	2420068352	2488761152	2261199367	1	3197605121	1	1.41412	0.515267
A8K6G4	#N/A	cDNA FLJ77564 OS=Homo sapiens OX=9606 PE=2 SV=1	30	18	111	18	1	735	80.2	7.14	279.58	18	0	8.08995e+08	5.39138e+08	4.53813e+08	5.78448e+08	4.02413e+08	7.94879e+08	1029508075	4.77603e+08	6.76101e+08	1	5.95099e+08	1	0.880192	0.638761
B0AZL7	#N/A	cDNA, FLJ79457, highly similar to Insulin-like growth factor-binding proteincomplex acid labile chain OS=Homo sapiens OX=9606 PE=2 SV=1	29	17	166	17	1	605	66	6.79	405.78	17	0	9.11165e+08	6.92763e+08	1694236137	1399826587	8.51277e+08	1062443233	1493061951	1368774844	1193889364	1	1174497752	1	0.983758	0.94515
Q6LAM1	#N/A	Heavy chain of factor I (Fragment) OS=Homo sapiens OX=9606 PE=2 SV=1	55	22	244	2	1	321	35.9	7.59	633.94	22	0	9.24546e+08	1016559362	2.20747e+08	4.95035e+08	1618356102	1489143342	7.26024e+08	4.8485e+08	1079593338	1	6.64222e+08	1	0.615252	0.262443
Q6MZW0	DKFZp686J11235	Uncharacterized protein DKFZp686J11235 (Fragment) OS=Homo sapiens OX=9606 GN=DKFZp686J11235 PE=1 SV=1	27	11	81	7	1	506	54.4	6.77	204.99	11	4	9.81182e+08	1229374654	1895913709	1675177349	6.8045e+08	9.27132e+08	8.34617e+08	1646767339	1022241438	1	1445411938	1	1.41396	0.206034
V9HWF6	HEL-S-153w	Alpha-1-acid glycoprotein OS=Homo sapiens OX=9606 GN=HEL-S-153w PE=2 SV=1	27	9	107	3	1	201	23.5	5.02	252.09	9	0	1036075544	8.72132e+08	7735713194	5421378990	2704903739	1209814608	2369027260	2740417497	2256040776	1	3766324918	1	1.66944	0.415952
H6VRG1	KRT1	Keratin 1 OS=Homo sapiens OX=9606 GN=KRT1 PE=3 SV=1	41	23	86	19	1	645	66.1	8.12	230.12	23	4	1051143548	7.91257e+08	3.77689e+08	4.90383e+08	2.33278e+08	8.15629e+08	5.49976e+08	1137583118	684116560	1	6.77618e+08	1	0.990501	0.979719
A8K9M5	#N/A	cDNA FLJ77947, highly similar to Human complement protein C8 beta subunit mRNA OS=Homo sapiens OX=9606 PE=2 SV=1	33	19	170	19	1	591	67	8.18	501.02	19	0	1060880447	5.74159e+08	1207167318	1342294906	1300834936	1069080819	1488536153	1136025916	1248619456	1	1046125343	1	0.837826	0.331912
P11226	MBL2	Mannose-binding protein C OS=Homo sapiens OX=9606 GN=MBL2 PE=1 SV=2	36	8	27	8	1	248	26.1	5.49	57.78	8	0	1079982238	7.21535e+07	301390673	9.70622e+07	5.07252e+08	3.89647e+08	2.71316e+08	174248498	3.35616e+08	1	3.87647e+08	1	1.15503	0.840257
A0A0S2Z4L3	PROS1	Protein S isoform 2 (Fragment) OS=Homo sapiens OX=9606 GN=PROS1 PE=2 SV=1	32	22	193	22	1	708	78.8	5.74	564.47	22	0	1098117271	1197502318	2028961427	1751494837	2118569530	1656184183	1839338954	1453797746	1766972603	1	1519018963	1	0.859673	0.3832
B2R950	#N/A	cDNA, FLJ94213, highly similar to Homo sapiens pregnancy-zone protein (PZP), mRNA OS=Homo sapiens OX=9606 PE=2 SV=1	28	38	379	30	1	1482	163.8	6.38	1012.12	38	3	1110659913	2570904363	2082519751	1059455642	4219970261	7672648155	12667706177	14051840504	9653041274	1	1705884917	1	0.17672	0.0135722
Q00887	PSG9	Pregnancy-specific beta-1-glycoprotein 9 OS=Homo sapiens OX=9606 GN=PSG9 PE=2 SV=2	29	14	199	1	1	426	48.2	8.07	412.18	14	5	1160624566	6.18064e+08	7.54909e+08	6.54875e+08	9.20884e+08	1557108754	1582652405	1288088077	1337183302	1	797118028	1	0.596117	0.0343084
P05543	SERPINA7	Thyroxine-binding globulin OS=Homo sapiens OX=9606 GN=SERPINA7 PE=1 SV=2	29	11	68	11	1	415	46.3	6.3	149.93	11	0	1162597607	1605736532	1369536245	1680574826	1869180660	1771349051	1828285336	1667941352	1784189100	1	1454611303	1	0.815279	0.0393551
P04003	C4BPA	C4b-binding protein alpha chain OS=Homo sapiens OX=9606 GN=C4BPA PE=1 SV=2	35	18	264	18	1	597	67	7.3	756.92	18	0	1164073153	2991347884	3592704862	4384832161	1378652471	2059876303	2135012788	2109937952	1920869879	1	3033239515	1	1.5791	0.167658
Q06033	ITIH3	Inter-alpha-trypsin inhibitor heavy chain H3 OS=Homo sapiens OX=9606 GN=ITIH3 PE=1 SV=2	14	15	157	15	1	890	99.8	5.74	451.68	15	0	1213720057	2235389876	1625093733	1342061434	1591475113	7.70204e+08	1451139984	870019753	1170709800	1	1604066275	1	1.37017	0.206986
P13727	PRG2	Bone marrow proteoglycan OS=Homo sapiens OX=9606 GN=PRG2 PE=1 SV=2	27	6	53	6	1	222	25.2	6.76	125.02	6	0	1223480638	1583595074	2954640712	1309346751	1076427681	1110699434	1139915573	1034296059	1090334687	1	1767765794	1	1.62131	0.144303
P80108	GPLD1	Phosphatidylinositol-glycan-specific phospholipase D OS=Homo sapiens OX=9606 GN=GPLD1 PE=1 SV=3	22	17	135	17	1	840	92.3	6.37	376.27	17	0	1317352124	1182837084	1407254481	1393832493	1171737230	9.9761e+08	9.90725e+08	1050983325	1052763935	1	1325319046	1	1.25889	0.00629965
P00738	HP	Haptoglobin OS=Homo sapiens OX=9606 GN=HP PE=1 SV=1	61	31	538	17	1	406	45.2	6.58	1386.67	31	13	1419657922	30517099647	38917026305	54156350469	22016235289	17064156679	13711522580	33884741345	21669163973	1	31252533586	1	1.44226	0.452421
P27169	PON1	Serum paraoxonase/arylesterase 1 OS=Homo sapiens OX=9606 GN=PON1 PE=1 SV=3	29	10	119	9	1	355	39.7	5.22	279.97	10	1	1458625080	2214564242	1822691669	1343001125	2286634087	1175144018	2607019250	9.80765e+08	1762390630	1	1709720529	1	0.970114	0.910261
A5PL32	APOL1	APOL1 protein (Fragment) OS=Homo sapiens OX=9606 GN=APOL1 PE=2 SV=1	22	13	91	1	1	439	48.5	7.17	231.33	13	12	1524309717	7.21797e+08	2956135163	2696770466	9.66642e+08	1017022403	8.11238e+08	3097344327	1473061621	1	1974753105	1	1.34058	0.529836
P00742	F10	Coagulation factor X OS=Homo sapiens OX=9606 GN=F10 PE=1 SV=2	22	13	77	13	1	488	54.7	5.94	176.79	13	0	1589776739	1618458542	1590407659	1069028964	1174305898	1541457594	1673263898	1023928003	1353238848	1	1466917976	1	1.08401	0.594084
O75882	ATRN	Attractin OS=Homo sapiens OX=9606 GN=ATRN PE=1 SV=2	22	34	233	34	1	1429	158.4	7.31	640.97	34	0	1646111146	1637057615	9.44806e+08	1140480612	1419923219	1711163146	1728458278	9.97096e+08	1464160136	1	1342113948	1	0.916644	0.638066
A0A024RAB9	C1QB	Adiponectin A OS=Homo sapiens OX=9606 GN=C1QB PE=4 SV=1	23	7	53	7	1	253	26.7	8.63	156.26	7	0	1665951163	6.54154e+08	1993597621	1443922638	2296339280	1566554951	1959969507	7.32798e+08	1638915503	1	1439406260	1	0.878268	0.667066
P15169	CPN1	Carboxypeptidase N catalytic chain OS=Homo sapiens OX=9606 GN=CPN1 PE=1 SV=1	21	11	97	11	1	458	52.3	7.34	259.44	11	0	1722699855	1463317317	1384969957	1078320840	1042626007	1074286921	1287278134	7.29817e+08	1033501964	1	1412326992	1	1.36655	0.0742287
P02671	FGA	Fibrinogen alpha chain OS=Homo sapiens OX=9606 GN=FGA PE=1 SV=2	18	13	83	13	1	866	94.9	6.01	280.48	13	0	1810281648	2321683099	1224631099	2.48789e+08	393752599	1488239379	1023941076	9.87673e+08	9.73402e+08	1	1401346176	1	1.43964	0.423278
A0A096LPE2	SAA2-SAA4	SAA2-SAA4 readthrough OS=Homo sapiens OX=9606 GN=SAA2-SAA4 PE=4 SV=1	39	10	86	8	1	208	23.3	8.98	219.12	10	2	1903795485	2223159837	4680219598	2500876279	7736766097	3130620931	1488841304	2524548798	3720194282	1	2827012800	1	0.75991	0.577694
G5E9F7	PSG1	Pregnancy specific beta-1-glycoprotein 1, isoform CRA_a OS=Homo sapiens OX=9606 GN=PSG1 PE=1 SV=1	29	10	141	1	1	326	36.9	8.75	301.37	10	3	1904870633	1959064701	1402688621	1071803729	1483329176	1889306914	2523555322	3450135586	2336581750	1	1584606921	1	0.678173	0.166749
A0A024RAA7	C1QC	Adiponectin B OS=Homo sapiens OX=9606 GN=C1QC PE=4 SV=1	39	8	66	8	1	245	25.8	8.41	178.57	8	0	1931746907	7.36936e+08	1419838907	1147814535	1998210117	1323794978	1967842959	8.87947e+08	1544448710	1	1309084193	1	0.847606	0.545248
A0A0S2Z3Y1	LGALS3BP	Lectin galactoside-binding soluble 3 binding protein isoform 1 (Fragment) OS=Homo sapiens OX=9606 GN=LGALS3BP PE=2 SV=1	28	16	120	16	1	585	65.3	5.27	309.22	16	0	1988922813	1645100518	1656741960	1047517195	1507286139	9.94095e+08	1522811903	1166376070	1297642171	1	1584570621	1	1.22112	0.268583
P22792	CPN2	Carboxypeptidase N subunit 2 OS=Homo sapiens OX=9606 GN=CPN2 PE=1 SV=3	18	9	78	9	1	545	60.5	5.99	215.74	9	0	2031804551	9.854e+08	1223671004	1144418614	1260905836	8.65558e+08	1195427092	441791546	940920539	1	1346323538	1	1.43086	0.22492
O95445	APOM	Apolipoprotein M OS=Homo sapiens OX=9606 GN=APOM PE=1 SV=2	35	10	87	10	1	188	21.2	6.01	177.77	10	0	2044172596	2629217475	3066620340	2210685543	2011826958	1709026351	1638844947	2061517573	1855303957	1	2487673988	1	1.34084	0.0461301
A0A087WT59	TTR	Transthyretin OS=Homo sapiens OX=9606 GN=TTR PE=1 SV=1	8	2	64	2	1	185	20.1	5.33	214.63	2	0	2052491996	1977783708	2566558729	2317091159	2616036747	3373772237	3616815789	2134162245	2935196754	1	2228481398	1	0.759227	0.102474
A0A2S0BDD1	ATIII-R2	Antithrombin III isoform OS=Homo sapiens OX=9606 GN=ATIII-R2 PE=2 SV=1	39	23	273	23	1	505	57.3	7.85	572.14	23	0	2127476725	1670905730	7.36961e+08	2938851383	4043960629	3981129022	4996564371	2168208212	3797465558	1	1868548718	1	0.492052	0.0418918
P08697	SERPINF2	Alpha-2-antiplasmin OS=Homo sapiens OX=9606 GN=SERPINF2 PE=1 SV=3	25	14	146	14	1	491	54.5	6.29	398.98	14	0	2135423367	2192421644	1742696139	1606420907	2101455423	2037245830	1938012813	2527702323	2151104097	1	1919240514	1	0.892212	0.277791
Q1HP67	LPA	Lipoprotein, Lp(A) OS=Homo sapiens OX=9606 GN=LPA PE=3 SV=1	41	33	200	33	1	2040	226.4	6.07	551.52	33	0	2178964862	2410980172	3.49512e+08	3102301791	6.8223e+08	1445157553	308877329	2118731220	1138749145	1	2010439629	1	1.76548	0.267003
A0A024R462	FN1	Fibronectin 1, isoform CRA_n OS=Homo sapiens OX=9606 GN=FN1 PE=4 SV=1	32	60	363	60	1	2355	259	5.73	1062.02	60	0	2238267947	18910709098	13312870796	3400003567	8.35821e+08	3.19668e+08	1030942787	9.44659e+07	5.70224e+08	1	9465462852	1	16.5995	0.0687117
P02654	APOC1	Apolipoprotein C-I OS=Homo sapiens OX=9606 GN=APOC1 PE=1 SV=1	40	7	100	7	1	83	9.3	8.47	247	7	0	2555261612	3538878546	3175220490	1829158939	2514086348	2309254137	1766968404	2847628097	2359484246	1	2774629897	1	1.17595	0.379838
Q14520	HABP2	Hyaluronan-binding protein 2 OS=Homo sapiens OX=9606 GN=HABP2 PE=1 SV=1	40	22	185	22	1	560	62.6	6.54	488.04	22	0	2559611619	2693622561	1888671206	1950550852	2444556322	2424810321	2450594521	1532862749	2213205978	1	2273114060	1	1.02707	0.851548
A0A1B0GUU9	IGHM	Immunoglobulin heavy constant mu (Fragment) OS=Homo sapiens OX=9606 GN=IGHM PE=1 SV=1	37	19	276	3	1	474	51.9	6.15	727.4	19	17	2829761553	397266776	7095301663	7746011015	3398402697	4136699527	9.83161e+08	12503151694	5255353685	1	4517085252	1	0.859521	0.817393
P02775	PPBP	Platelet basic protein OS=Homo sapiens OX=9606 GN=PPBP PE=1 SV=3	47	8	78	8	1	128	13.9	8.79	238.7	8	0	2868163330	4869355365	2240257171	1726534952	3675671780	2009872433	5268314187	1592651222	3136627405	1	2926077704	1	0.932874	0.852794
P04278	SHBG	Sex hormone-binding globulin OS=Homo sapiens OX=9606 GN=SHBG PE=1 SV=2	33	13	106	13	1	402	43.8	6.71	279.62	13	0	2956882468	2092730291	1126800009	1120946251	1221990609	2418929176	1438860812	1968603088	1762095921	1	1824339755	1	1.03532	0.908084
P05546	SERPIND1	Heparin cofactor 2 OS=Homo sapiens OX=9606 GN=SERPIND1 PE=1 SV=3	26	17	170	17	1	499	57	6.9	415.38	17	0	2981761915	3524460693	5369146334	4977492480	2970295784	2651842179	2531895024	2897700730	2762933429	1	4213215355	1	1.52491	0.0465218
C9JF17	APOD	Apolipoprotein D (Fragment) OS=Homo sapiens OX=9606 GN=APOD PE=1 SV=1	36	12	117	12	1	215	24.1	5.6	283.74	12	0	3026148307	5630451770	3847135700	1793804782	1617211236	2719404873	1291834823	2302538624	1982747389	1	3574385140	1	1.80274	0.11619
P02753	RBP4	Retinol-binding protein 4 OS=Homo sapiens OX=9606 GN=RBP4 PE=1 SV=3	30	8	131	8	1	201	23	6.07	334.99	8	0	3089002226	4992399024	3582376473	2750536548	4022419250	3564988134	4676873926	2333469184	3649437623	1	3603578568	1	0.987434	0.949789
P04275	VWF	von Willebrand factor OS=Homo sapiens OX=9606 GN=VWF PE=1 SV=4	28	69	416	2	1	2813	309.1	5.48	1052.14	69	61	3313805131	5894174139	3117533811	2216321246	1612710459	1808841099	1591557095	9.07732e+08	1480210180	1	3635458582	1	2.45604	0.0381613
P09871	C1S	Complement C1s subcomponent OS=Homo sapiens OX=9606 GN=C1S PE=1 SV=1	41	24	224	23	1	688	76.6	4.96	563.23	24	1	3321897532	3271303186	2358772481	2075167411	4397781441	3237155668	2930620418	1679900648	3061364544	1	2756785152	1	0.900509	0.652087
P10643	C7	Complement component C7 OS=Homo sapiens OX=9606 GN=C7 PE=1 SV=2	50	43	312	43	1	843	93.5	6.48	793.48	43	0	3663027861	2882344607	3631964441	2552304253	4140665164	4616852929	3844834110	3243157147	3961377337	1	3182410290	1	0.80336	0.0988115
B4DPQ0	C1R	Complement C1r subcomponent OS=Homo sapiens OX=9606 GN=C1R PE=1 SV=1	31	25	250	23	1	719	81.8	6.37	641.03	25	2	3717926865	4884069362	2792484891	2336672855	4630701108	3717062746	2941620756	2381612812	3417749355	1	3432788493	1	1.0044	0.984549
B1AHL2	FBLN1	Fibulin-1 OS=Homo sapiens OX=9606 GN=FBLN1 PE=1 SV=1	21	17	151	6	1	721	78.3	5.39	381.48	17	11	3926690346	2770060360	2177013063	1814855925	9.00358e+08	2036899176	3236724021	1487559743	1915385215	1	2672154923	1	1.3951	0.307895
A0A384N669	#N/A	Epididymis secretory sperm binding protein OS=Homo sapiens OX=9606 PE=2 SV=1	30	12	178	12	1	338	38.4	6.61	398.34	12	0	4243695623	1861123961	1804979116	1704189281	3088845760	2374981465	2992767718	1748744695	2551334910	1	2403496995	1	0.942055	0.837072
A0A140VK00	#N/A	Testicular tissue protein Li 227 OS=Homo sapiens OX=9606 PE=2 SV=1	54	23	317	23	1	298	34.2	6.05	871.29	23	0	4283839482	5767131796	9928121114	6226025467	7846881119	9055202660	9321973353	7373114979	8399293028	1	6551279465	1	0.77998	0.201324
Q16557	PSG3	Pregnancy-specific beta-1-glycoprotein 3 OS=Homo sapiens OX=9606 GN=PSG3 PE=2 SV=2	35	16	201	2	1	428	47.9	8.54	512.84	16	14	4374524492	2268708834	2490988815	1711996976	2722201392	4936323896	5794680201	3861753446	4328739734	1	2711554779	1	0.626407	0.11628
P13671	C6	Complement component C6 OS=Homo sapiens OX=9606 GN=C6 PE=1 SV=3	37	39	340	2	1	934	104.7	6.76	920.78	39	34	4621044793	4588037592	2417712269	3426301763	4133364490	4845135536	4382198282	2785255672	4036488495	1	3763274105	1	0.932314	0.705228
P36955	SERPINF1	Pigment epithelium-derived factor OS=Homo sapiens OX=9606 GN=SERPINF1 PE=1 SV=4	36	17	172	17	1	418	46.3	6.38	427.45	17	0	4647322079	3040059121	2118930724	2178030249	4903586686	3700100251	5215747818	3463476828	4320727896	1	2996085543	1	0.693421	0.120293
Q8N355	IGL@	IGL@ protein OS=Homo sapiens OX=9606 GN=IGL@ PE=1 SV=1	39	7	118	1	1	234	24.8	6.37	232.56	7	2	4674343122	1608480146	7.26985e+08	1190993710	1690615644	2096106756	2546798351	1501506759	1958756877	1	2050200370	1	1.04668	0.924282
A0A2Z4LCH4	#N/A	Corticosteroid-binding globulin OS=Homo sapiens OX=9606 PE=2 SV=1	16	7	57	7	1	405	45.1	6.04	126.58	7	0	4725051599	2488248162	1585976012	3333529969	4642924122	8488062969	4294245515	3574196571	5249857294	1	3033201436	1	0.577768	0.136133
A0A024R035	C9	Complement component 9, isoform CRA_a OS=Homo sapiens OX=9606 GN=C9 PE=4 SV=1	38	26	203	26	1	559	63.2	5.52	570.97	26	0	4735815989	3414564932	3787773643	3354892717	4813150117	3939413471	4041033214	3392122597	4046429850	1	3823261820	1	0.944848	0.624556
P01031	C5	Complement C5 OS=Homo sapiens OX=9606 GN=C5 PE=1 SV=4	28	54	404	54	1	1676	188.2	6.52	1009.55	54	0	4773956309	6509176711	6061876032	5442579235	5949090481	5864648382	5138251403	5503932304	5613980642	1	5696897072	1	1.01477	0.850235
P07357	C8A	Complement component C8 alpha chain OS=Homo sapiens OX=9606 GN=C8A PE=1 SV=2	32	20	154	20	1	584	65.1	6.47	444.53	20	0	5004219453	3036398943	2048998988	3347774988	4149660484	7673376970	3793873604	3011698151	4657152302	1	3359348093	1	0.721331	0.321718
P03952	KLKB1	Plasma kallikrein OS=Homo sapiens OX=9606 GN=KLKB1 PE=1 SV=1	54	35	337	35	1	638	71.3	8.22	876.88	35	0	5475456494	4857518094	3061890512	5057639494	5565128225	5896660883	5892403650	4753316135	5526877223	1	4613126149	1	0.834671	0.176776
E7ETH0	CFI	Complement factor I OS=Homo sapiens OX=9606 GN=CFI PE=1 SV=1	39	26	255	6	1	591	66.6	7.59	626.72	26	20	5988205377	5556980513	1889025131	3120937117	7553333521	7041084010	3706333700	3062404856	5340789022	1	4138787035	1	0.774939	0.454905
B0YIW2	APOC3	Apolipoprotein C-III variant 1 OS=Homo sapiens OX=9606 GN=APOC3 PE=1 SV=1	37	6	286	6	1	117	12.8	8.18	611.64	6	0	6820070833	15445027449	45552050021	19590677556	7539634765	5939094512	6869509664	5915820183	6566014781	1	21851956465	1	3.32804	0.116705
A0A384MEF1	#N/A	Epididymis secretory sperm binding protein OS=Homo sapiens OX=9606 PE=2 SV=1	34	28	236	2	1	782	85.6	6.28	623.14	28	24	7379631797	2502386518	4120747959	3258624449	5474887134	4518926022	4272159901	3510811012	4444196017	1	4315347681	1	0.971008	0.914256
E9PGN7	SERPING1	Plasma protease C1 inhibitor OS=Homo sapiens OX=9606 GN=SERPING1 PE=1 SV=1	32	20	230	20	1	543	59.5	6.76	532.15	20	0	7759069106	6379691054	7914445103	9071350959	1300498808	7227808436	7279614108	8234986023	6010726844	1	7781139055	1	1.29454	0.332563
A0A384NKS6	#N/A	Epididymis secretory sperm binding protein OS=Homo sapiens OX=9606 PE=2 SV=1	44	23	234	23	1	501	57.8	6.68	670.77	23	0	8244454325	9067723544	9843922110	9019439644	11297446766	9450337588	7531486227	6567106858	8711594360	1	9043884906	1	1.03814	0.772667
P02768	ALB	Serum albumin OS=Homo sapiens OX=9606 GN=ALB PE=1 SV=2	63	48	426	48	1	609	69.3	6.28	1124.26	48	0	8443768070	2794525411	11434937868	29189818189	10227642038	8296737191	12665508380	35182703848	16593147864	1	12965762385	1	0.781393	0.683222
P02750	LRG1	Leucine-rich alpha-2-glycoprotein OS=Homo sapiens OX=9606 GN=LRG1 PE=1 SV=2	29	13	128	13	1	347	38.2	6.95	309.1	13	0	9145693339	10276812047	9878213775	6829822265	11342302385	17648182294	11060317611	8562996770	12153449765	1	9032635357	1	0.743216	0.184718
P08603	CFH	Complement factor H OS=Homo sapiens OX=9606 GN=CFH PE=1 SV=4	58	72	864	2	1	1231	139	6.61	2262.83	72	70	10253686411	20660742395	14283672131	31171450160	12089202103	10716481513	11028125928	16206593915	12510100865	1	19092387774	1	1.52616	0.213734
K7ER74	APOC4-APOC2	APOC4-APOC2 readthrough (NMD candidate) OS=Homo sapiens OX=9606 GN=APOC4-APOC2 PE=1 SV=1	26	7	82	5	1	178	20	6.64	190.07	7	2	10268506866	14645308387	8296673841	5227321099	6497893259	4322794985	6070468263	3681719958	5143219116	1	9609452548	1	1.86837	0.0760569
Q59EP2	#N/A	Angiotensinogen variant (Fragment) OS=Homo sapiens OX=9606 PE=2 SV=1	21	11	174	11	1	491	53.7	6.42	428.26	11	0	10410327896	7502675909	4066577684	4527129030	8270958580	8258235349	8946365606	4286212952	7440443122	1	6626677630	1	0.890629	0.669982
B3KS79	#N/A	cDNA FLJ35730 fis, clone TESTI2003131, highly similar to ALPHA-1-ANTICHYMOTRYPSIN OS=Homo sapiens OX=9606 PE=2 SV=1	38	21	337	21	1	448	50.6	5.63	932.41	21	0	10454864105	11054849790	13964560971	10333194844	18903557374	13134918849	10876951710	12301032924	13804115214	1	11451867427	1	0.829598	0.274839
P19827	ITIH1	Inter-alpha-trypsin inhibitor heavy chain H1 OS=Homo sapiens OX=9606 GN=ITIH1 PE=1 SV=3	28	24	340	13	1	911	101.3	6.79	1017.45	24	13	10588487990	16305483177	10975649820	13003918145	17949774392	13302998633	13102695481	11651734628	14001800784	1	12718384783	1	0.908339	0.522715
Q13219	PAPPA	Pappalysin-1 OS=Homo sapiens OX=9606 GN=PAPPA PE=1 SV=3	35	50	461	50	1	1627	180.9	6.18	1251.35	50	0	10922560684	8048548165	7613253215	2861962129	4400077234	6398755166	8586092674	3150698227	5633905825	1	7361581049	1	1.30666	0.431757
P00734	F2	Prothrombin OS=Homo sapiens OX=9606 GN=F2 PE=1 SV=2	52	33	540	33	1	622	70	5.9	1692	33	0	11108741210	11689321794	14612826282	11976906430	11283441042	10917679644	11904418272	9147702618	10813310394	1	12346948929	1	1.14183	0.167198
P02760	AMBP	Protein AMBP OS=Homo sapiens OX=9606 GN=AMBP PE=1 SV=1	43	20	225	14	1	352	39	6.25	645.11	20	6	11397444965	12958638308	9180284619	6375680464	9503645669	8416172700	9298124668	6451166730	8417277442	1	9978012089	1	1.18542	0.364182
B4E1B2	#N/A	cDNA FLJ53691, highly similar to Serotransferrin OS=Homo sapiens OX=9606 PE=2 SV=1	64	67	1071	4	1	678	74.8	7.12	2669.28	67	64	12751778274	12011217085	91245559664	101000000000	20059304807	10075637737	39143825499	56646353565	31481280402	1	54296958225	1	1.72474	0.420516
P01023	A2M	Alpha-2-macroglobulin OS=Homo sapiens OX=9606 GN=A2M PE=1 SV=3	38	53	770	48	1	1474	163.2	6.46	2033.28	53	6	16625257605	25364602314	45053097773	28128607025	5216307355	12996194449	18482046848	45323473362	20504505503	1	28792891179	1	1.40422	0.461842
P43652	AFM	Afamin OS=Homo sapiens OX=9606 GN=AFM PE=1 SV=1	54	47	458	47	1	599	69	5.9	1068.98	47	0	17017977699	10970946189	8717383339	13029447306	13646288826	12802288349	18891388632	10174338749	13878576139	1	12433938633	1	0.895909	0.590076
D9IWP9	#N/A	Beta-2-glycoprotein I (Fragment) OS=Homo sapiens OX=9606 PE=2 SV=1	61	25	433	25	1	326	36.2	8	1150.45	25	0	20027976238	18343870087	11550751118	9539790870	20010326386	23697453294	20582700308	8545946098	18209106521	1	14865597078	1	0.816383	0.4551
B2RMS9	ITIH4	Inter-alpha (Globulin) inhibitor H4 (Plasma Kallikrein-sensitive glycoprotein) OS=Homo sapiens OX=9606 GN=ITIH4 PE=2 SV=1	33	32	416	1	1	930	103.3	6.98	1022.87	32	35	21157227641	19157438509	21309783688	20062675214	15253946434	23499453691	21509230101	24418617578	21170311951	1	20421781263	1	0.964642	0.73661
P00747	PLG	Plasminogen OS=Homo sapiens OX=9606 GN=PLG PE=1 SV=2	61	62	901	62	1	810	90.5	7.24	2527.62	62	0	21974419469	18185836327	24948933721	27570752174	32368139798	27136387774	31929707749	22918148622	28588095986	1	23169985423	1	0.810477	0.121656
P06727	APOA4	Apolipoprotein A-IV OS=Homo sapiens OX=9606 GN=APOA4 PE=1 SV=3	72	43	539	43	1	396	45.4	5.38	1480.82	43	0	23103949046	21822929456	22620262334	17863304061	28978602023	19720874591	21178206753	25169234871	23761729560	1	21352611224	1	0.898614	0.354711
A0A0G2JPR0	C4A	Complement C4-A OS=Homo sapiens OX=9606 GN=C4A PE=1 SV=1	40	83	951	3	1	1744	192.8	7.03	2536.89	83	78	24342022375	28905088751	17853885777	37223171507	30422646650	28497742918	41104739380	38958271077	34745850006	1	27081042103	1	0.779404	0.185128
P04217	A1BG	Alpha-1B-glycoprotein OS=Homo sapiens OX=9606 GN=A1BG PE=1 SV=4	35	18	504	12	1	495	54.2	5.86	1183.53	18	6	25037195215	27400344296	30252034123	18659801622	20402791856	20583510823	28397031028	26678139293	24015368250	1	25337343814	1	1.05505	0.695415
B7Z8Q2	#N/A	cDNA FLJ55606, highly similar to Alpha-2-HS-glycoprotein OS=Homo sapiens OX=9606 PE=2 SV=1	28	15	450	15	1	433	46.6	6.28	1263.21	15	0	29027674081	19026488947	16878257677	24368591093	15431782506	19160500817	17957559313	21155264758	18426276849	1	22325252950	1	1.2116	0.239129
P02649	APOE	Apolipoprotein E OS=Homo sapiens OX=9606 GN=APOE PE=1 SV=1	77	40	498	37	1	317	36.1	5.73	1137.25	40	4	30275812588	27341484194	83281985078	29254941048	17050997093	7085689058	9065006028	9845279498	10761742919	1	42538555727	1	3.95276	0.0604284
D9ZGG2	VTN	Vitronectin OS=Homo sapiens OX=9606 GN=VTN PE=4 SV=1	32	17	449	15	1	478	54.3	5.8	1096.6	17	3	31618938732	27484602556	18975820497	19853311565	31954662364	25131193518	26027693997	18005803780	25279838415	1	24483168338	1	0.968486	0.855156
V9GYM3	APOA2	Apolipoprotein A-II OS=Homo sapiens OX=9606 GN=APOA2 PE=1 SV=1	20	8	446	8	1	133	14.9	8.27	800.59	8	0	39417701662	37847518257	56405289008	35535880010	49299721902	35969436780	39812367274	40365029312	41361638817	1	42301597234	1	1.02273	0.870852
P02790	HPX	Hemopexin OS=Homo sapiens OX=9606 GN=HPX PE=1 SV=2	56	29	2191	29	1	462	51.6	7.02	4126.26	29	0	39460093984	42818027066	58607056113	87087092206	76161798763	71894628332	92030146743	68263098982	77087418205	1	56993067342	1	0.73933	0.146748
C0JYY2	APOB	Apolipoprotein B (Including Ag(X) antigen), isoform CRA_a OS=Homo sapiens OX=9606 GN=APOB PE=4 SV=1	39	202	1742	147	1	4563	515.2	7.05	4199.74	202	55	42682297246	53190247191	83948211620	43934729564	36537554495	24642021929	29275828748	25303699960	28939776283	1	55938871405	1	1.93294	0.0356573
B4E1Z4	#N/A	cDNA FLJ55673, highly similar to Complement factor B OS=Homo sapiens OX=9606 PE=1 SV=1	43	70	849	49	1	1266	140.9	7.18	2295.25	70	19	48035470298	37205419840	19117919341	28855687624	51012480068	50166241549	35405924602	34344336790	42732245752	1	33303624276	1	0.779356	0.263515
A5PL27	CP	CP protein OS=Homo sapiens OX=9606 GN=CP PE=2 SV=1	46	57	1452	53	1	1065	122.1	5.72	3114.13	57	4	50415521061	50599486803	37669500787	51304316589	38500890545	64286555161	61163535914	54872434899	54705854130	1	47497206310	1	0.868229	0.317748
D3DRR6	ITIH2	Inter-alpha (Globulin) inhibitor H2, isoform CRA_a OS=Homo sapiens OX=9606 GN=ITIH2 PE=4 SV=1	30	34	576	34	1	947	106.5	6.95	1394.74	34	0	54843880034	61405479173	41334379927	30258390153	43505621623	38807197655	51840252192	33630255979	41945831862	1	46960532322	1	1.11955	0.552028
D3DNU8	KNG1	Kininogen 1, isoform CRA_a OS=Homo sapiens OX=9606 GN=KNG1 PE=4 SV=1	59	40	728	6	1	427	47.8	6.65	1634.62	40	35	55895343788	46812994776	18137027822	36435708563	57371652396	57202884637	57686517365	33424599113	51421413378	1	39320268738	1	0.764667	0.275292
A0A384MDQ7	#N/A	Epididymis secretory sperm binding protein OS=Homo sapiens OX=9606 PE=2 SV=1	63	34	1477	27	1	418	46.7	5.59	2343.81	34	9	105000000000	94587813574	97441736770	96738154424	97918609909	108000000000	90913282859	145000000000	110000000000	1	98439191071	1	0.891133	0.365261
D6RF35	GC	Vitamin D-binding protein OS=Homo sapiens OX=9606 GN=GC PE=1 SV=1	62	43	1845	3	1	476	53	5.52	3983.76	43	43	108000000000	84663654979	55864326525	63609929282	102000000000	115000000000	92952725492	73310381582	95933864093	1	78123493237	1	0.814347	0.271566
P01024	C3	Complement C3 OS=Homo sapiens OX=9606 GN=C3 PE=1 SV=2	60	136	3504	136	1	1663	187	6.4	7533.48	136	0	206000000000	196000000000	150000000000	186000000000	179000000000	217000000000	187000000000	158000000000	185000000000	1	185000000000	1	0.995712	0.96506
P02647	APOA1	Apolipoprotein A-I OS=Homo sapiens OX=9606 GN=APOA1 PE=1 SV=1	83	44	3680	44	1	267	30.8	5.76	5900.82	44	0	260000000000	259000000000	176000000000	206000000000	272000000000	247000000000	232000000000	281000000000	258000000000	1	225000000000	1	0.872872	0.212992
V9HWI6	HEL-S-51	Epididymis secretory protein Li 51 OS=Homo sapiens OX=9606 GN=HEL-S-51 PE=2 SV=1	67	42	1770	2	1	474	52.9	5.54	3823.99	42	0	NA	3451208657	NA	1897695112	205631	1.50689e+06	4711383812	1921846121	1658735613	1	2674451885	0.5	1.61234	0.59011
B7Z1F8	#N/A	cDNA FLJ53025, highly similar to Complement C4-B OS=Homo sapiens OX=9606 PE=2 SV=1	52	16	219	2	1	270	30.4	7.99	662.92	16	0	NA	NA	2.50688e+08	3.74845e+08	NA	1.33494e+08	4.47317e+08	5.72494e+07	2.12687e+08	0.75	3.12767e+08	0.5	1.47055	0.577996
D3DQX7	SAA1	Serum amyloid A protein OS=Homo sapiens OX=9606 GN=SAA1 PE=3 SV=1	55	9	66	2	1	122	13.6	6.79	222.26	9	5	NA	NA	1.86981e+08	8.37423e+07	3534931545	5.68836e+08	1.02275e+08	5.18966e+07	1064484709	1	1.35362e+08	0.5	0.127162	0.497906
B7Z7M2	#N/A	cDNA FLJ51564, highly similar to Pregnancy zone protein OS=Homo sapiens OX=9606 PE=2 SV=1	41	6	57	2	1	136	15	5.11	152.6	6	0	NA	NA	1.40197e+07	NA	NA	145201878	NA	1.2078e+08	1.32991e+08	0.5	1.40197e+07	0.25	0.105419	NA
P0DOX7	#N/A	Immunoglobulin kappa light chain OS=Homo sapiens OX=9606 PE=1 SV=1	31	5	33	1	1	214	23.4	7.17	125.14	5	0	NA	NA	1.44593e+07	1.61371e+07	10219992	5.21294e+06	NA	3.97495e+07	1.83941e+07	0.75	1.52982e+07	0.5	0.831687	0.838327
Q6NS95	IGL@	IGL@ protein OS=Homo sapiens OX=9606 GN=IGL@ PE=2 SV=1	39	7	46	0	1	234	25.1	6.67	115.08	7	1	NA	NA	1.53161e+07	1.4702e+07	6.65973e+06	4.5951e+06	NA	NA	5.62741e+06	0.5	1.5009e+07	0.5	2.66713	0.0129239
Q9H804	#N/A	cDNA FLJ14022 fis, clone HEMBA1003538, weakly similar to COMPLEMENT C1R COMPONENT OS=Homo sapiens OX=9606 PE=2 SV=1	18	7	43	1	1	438	48	7.46	115.01	7	0	NA	3.52214e+06	7.16178e+06	NA	8886659	NA	3.48849e+06	NA	6.18757e+06	0.5	5.34196e+06	0.5	0.863337	0.819339
Q6GMW4	IGL@	IGL@ protein OS=Homo sapiens OX=9606 GN=IGL@ PE=2 SV=1	36	7	45	1	1	233	24.8	6.74	105.23	7	0	NA	NA	NA	2.48084e+07	2852701	NA	NA	1.83462e+07	1.05994e+07	0.5	2.48084e+07	0.25	2.34054	NA
P08779	KRT16	Keratin, type I cytoskeletal 16 OS=Homo sapiens OX=9606 GN=KRT16 PE=1 SV=4	16	8	27	2	1	473	51.2	5.05	54.64	8	0	NA	2.93962e+06	1.14929e+06	2.16285e+06	NA	4.86194e+06	NA	NA	4.86194e+06	0.25	2.08392e+06	0.75	0.428619	NA
B2R701	#N/A	cDNA, FLJ93202, Homo sapiens protease inhibitor 16 (PI16), mRNA OS=Homo sapiens OX=9606 PE=2 SV=1	12	5	20	1	1	428	45.7	5.38	41.49	5	0	NA	NA	1.69098e+06	9.57754e+06	9931180	NA	9.42563e+06	NA	9.6784e+06	0.5	5.63426e+06	0.5	0.582148	0.413718
Q6XMI6	#N/A	C4 (Fragment) OS=Homo sapiens OX=9606 PE=4 SV=1	73	3	15	1	1	41	4.4	5.01	37.84	3	0	NA	NA	2.49122e+07	NA	NA	1.25928e+06	NA	5.91589e+06	3.58759e+06	0.5	2.49122e+07	0.25	6.944	NA
Q13740	ALCAM	CD166 antigen OS=Homo sapiens OX=9606 GN=ALCAM PE=1 SV=2	9	4	13	4	1	583	65.1	6.25	32.89	4	0	NA	397723	318262	402122	628271	475808	859653	323908	571910	1	372702	0.75	0.65168	0.20602
O43278	SPINT1	Kunitz-type protease inhibitor 1 OS=Homo sapiens OX=9606 GN=SPINT1 PE=1 SV=2	11	5	14	5	1	529	58.4	6.29	22.94	5	0	NA	NA	1.03797e+06	3.48339e+06	NA	1.85249e+06	4.49967e+06	1.7822e+06	2.71145e+06	0.75	2.26068e+06	0.5	0.833751	0.779295
A0A0S4XRV0	HLA-A	MHC Class I Antigen OS=Homo sapiens OX=9606 GN=HLA-A PE=3 SV=1	17	5	8	4	1	365	40.7	6.25	22.38	5	0	NA	NA	5.20462e+06	2.53571e+07	32613470	NA	3.20075e+06	1.79376e+07	1.79173e+07	0.75	1.52809e+07	0.5	0.852858	0.855409
Q9UJJ9	GNPTG	N-acetylglucosamine-1-phosphotransferase subunit gamma OS=Homo sapiens OX=9606 GN=GNPTG PE=1 SV=1	11	2	9	2	1	305	34	6.95	19.56	2	0	NA	2.04603e+06	3.05166e+06	4.03431e+06	5.89805e+06	1.8964e+06	465576	1.37155e+06	2.40789e+06	1	3.044e+06	0.75	1.26417	0.688995
A2MYE1	#N/A	A30 (Fragment) OS=Homo sapiens OX=9606 PE=4 SV=1	31	2	4	2	1	96	10.4	8.5	15.52	2	0	NA	7.8665e+06	NA	4.56209e+06	NA	NA	NA	1.05547e+07	1.05547e+07	0.25	6.2143e+06	0.5	0.588771	NA
A0A384MDM4	#N/A	Epididymis secretory sperm binding protein OS=Homo sapiens OX=9606 PE=2 SV=1	2	4	6	3	1	2871	312	4.93	14.18	4	1	NA	1.49171e+06	853101	372406	1.68177e+06	8.00982e+06	9.6027e+06	3.97042e+06	5.81618e+06	1	905740	0.75	0.155728	0.0728789
Q9UL89	#N/A	Myosin-reactive immunoglobulin heavy chain variable region (Fragment) OS=Homo sapiens OX=9606 PE=2 SV=1	10	1	5	1	1	116	12.6	9.1	14.08	1	0	NA	NA	3.22815e+06	1.25391e+07	9164854	824010	3.67871e+06	3.7241e+06	4.34792e+06	1	7.8836e+06	0.5	1.81319	0.412414
E9PK25	CFL1	Cofilin-1 OS=Homo sapiens OX=9606 GN=CFL1 PE=1 SV=1	19	2	6	2	1	204	22.7	8.34	13.71	2	0	NA	1.57468e+07	NA	NA	9000490	9.83232e+06	NA	NA	9.4164e+06	0.5	1.57468e+07	0.25	1.67227	NA
Q6UY14	ADAMTSL4	ADAMTS-like protein 4 OS=Homo sapiens OX=9606 GN=ADAMTSL4 PE=1 SV=2	3	3	7	3	1	1074	116.5	8.34	9.93	3	0	NA	NA	1.09157e+06	774238	1.07546e+06	544542	852104	NA	824036	0.75	932902	0.5	1.13211	0.66988
Q8TE63	#N/A	Immunglobulin light chain variable region (Fragment) OS=Homo sapiens OX=9606 PE=2 SV=1	15	2	4	1	1	110	11.5	8.91	9.92	2	0	NA	NA	9.91457e+06	1.41989e+07	NA	NA	NA	1.25596e+07	1.25596e+07	0.25	1.20568e+07	0.5	0.959965	NA
A2KUC4	IGLV	UGa8L (Fragment) OS=Homo sapiens OX=9606 GN=IGLV PE=4 SV=1	14	2	4	1	1	112	12.2	5.1	9.87	2	0	NA	NA	1.67307e+07	7.15929e+06	5626057	6.75757e+06	NA	5.92323e+06	6.10229e+06	0.75	1.1945e+07	0.5	1.95747	0.202465
P59665	DEFA1	Neutrophil defensin 1 OS=Homo sapiens OX=9606 GN=DEFA1 PE=1 SV=1	19	2	4	2	1	94	10.2	6.99	8.39	2	0	NA	NA	7.70971e+06	7.27311e+06	NA	NA	NA	4.28075e+06	4.28075e+06	0.25	7.49141e+06	0.5	1.75002	NA
B4DJ30	#N/A	cDNA FLJ61290, highly similar to Neutral alpha-glucosidase AB OS=Homo sapiens OX=9606 PE=2 SV=1	4	3	6	3	1	995	112.9	6.06	8.01	3	0	NA	NA	193776	400506	221372	164659	NA	383046	256359	0.75	297141	0.5	1.15908	0.744914
P06312	IGKV4-1	Immunoglobulin kappa variable 4-1 OS=Homo sapiens OX=9606 GN=IGKV4-1 PE=1 SV=1	12	1	4	1	1	121	13.4	5.25	7.31	1	0	NA	NA	2.417e+06	6.01528e+06	1.3344e+06	642647	NA	1.416e+06	1.13101e+06	0.75	4.21614e+06	0.5	3.72775	0.111063
Q9NQS3	NECTIN3	Nectin-3 OS=Homo sapiens OX=9606 GN=NECTIN3 PE=1 SV=1	3	2	3	2	1	549	61	6.19	7.21	2	0	NA	287530	NA	8.59751e+06	21339732	5.10103e+07	5.34856e+07	2.11679e+07	3.67509e+07	1	4.44252e+06	0.5	0.120882	0.0775321
P58166	INHBE	Inhibin beta E chain OS=Homo sapiens OX=9606 GN=INHBE PE=1 SV=1	5	1	2	1	1	350	38.5	9.25	6.98	1	0	NA	NA	3.83715e+06	NA	NA	NA	3.02732e+06	NA	3.02732e+06	0.25	3.83715e+06	0.25	1.26751	NA
Q59G88	#N/A	Coronin (Fragment) OS=Homo sapiens OX=9606 PE=3 SV=1	6	3	3	3	1	558	59.6	8.13	6.55	3	0	NA	668702	937986	NA	2.12501e+06	1.26581e+06	NA	NA	1.69541e+06	0.5	803344	0.5	0.473834	0.186049
A0A0X9UWK7	#N/A	MS-D4 heavy chain variable region (Fragment) OS=Homo sapiens OX=9606 PE=2 SV=1	10	1	2	1	1	122	13.5	7.12	6.53	1	0	NA	NA	1.11832e+07	9.80015e+06	6498572	1.32652e+07	NA	5.02392e+06	8.26256e+06	0.75	1.04917e+07	0.5	1.26979	0.549568
D3DPK5	SH3BGRL3	SH3 domain binding glutamic acid-rich protein like 3, isoform CRA_a (Fragment) OS=Homo sapiens OX=9606 GN=SH3BGRL3 PE=4 SV=1	4	1	3	1	1	257	26.8	8.38	6.46	1	0	NA	1.32641e+07	4.92452e+06	NA	18026052	2.5723e+07	6.32339e+06	NA	1.66908e+07	0.75	9.09429e+06	0.5	0.544868	0.40806
P05154	SERPINA5	Plasma serine protease inhibitor OS=Homo sapiens OX=9606 GN=SERPINA5 PE=1 SV=3	3	1	2	1	1	406	45.6	9.26	6.38	1	0	NA	514668	6.30974e+06	5.22002e+06	NA	NA	NA	6.15075e+06	6.15075e+06	0.25	4.01481e+06	0.75	0.652735	NA
P19022	CDH2	Cadherin-2 OS=Homo sapiens OX=9606 GN=CDH2 PE=1 SV=4	1	1	7	1	1	906	99.7	4.81	6.15	1	0	NA	3.24933e+06	3.00257e+06	1.41574e+06	1.86753e+06	2.14195e+06	3.17066e+06	1.63503e+06	2.20379e+06	1	2.55588e+06	0.75	1.15976	0.597918
Q14766	LTBP1	Latent-transforming growth factor beta-binding protein 1 OS=Homo sapiens OX=9606 GN=LTBP1 PE=1 SV=4	3	3	3	3	1	1721	186.7	5.96	5.97	3	0	NA	2.06191e+06	NA	1.97088e+06	NA	NA	NA	2.1071e+06	2.1071e+06	0.25	2.01639e+06	0.5	0.956953	NA
P01833	PIGR	Polymeric immunoglobulin receptor OS=Homo sapiens OX=9606 GN=PIGR PE=1 SV=4	3	2	3	2	1	764	83.2	5.74	5.87	2	0	NA	NA	1.29464e+06	3.846e+06	NA	1.77538e+06	NA	4.40511e+06	3.09024e+06	0.5	2.57032e+06	0.5	0.831755	0.803248
Q9UIU0	CACNA2D1	Dihydropyridine receptor alpha 2 subunit OS=Homo sapiens OX=9606 GN=CACNA2D1 PE=4 SV=1	2	2	2	2	1	1110	125.2	5.36	5.54	2	0	NA	312328	NA	600089	674951	NA	1.20926e+06	NA	942107	0.5	456208	0.5	0.484243	0.250462
P05160	F13B	Coagulation factor XIII B chain OS=Homo sapiens OX=9606 GN=F13B PE=1 SV=3	3	2	2	2	1	661	75.5	6.39	5.41	2	0	NA	NA	1.90962e+06	4.45895e+06	3.46621e+06	1.12734e+06	1.64987e+06	NA	2.08114e+06	0.75	3.18428e+06	0.5	1.53007	0.464357
A0A386NEX7	BST1	Bone marrow stromal cell antigen 1 variant 2 OS=Homo sapiens OX=9606 GN=BST1 PE=2 SV=1	3	1	2	1	1	333	37.5	7.97	4.95	1	0	NA	NA	1.18154e+06	1.39983e+06	2305285	NA	NA	NA	2305285	0.25	1.29068e+06	0.5	0.55988	NA
A0A0S2Z3F6	CETP	Cholesteryl ester transfer protein plasma isoform 1 (Fragment) OS=Homo sapiens OX=9606 GN=CETP PE=2 SV=1	4	2	2	2	1	493	54.7	6.09	4.65	2	0	NA	NA	4.49001e+06	4.78978e+06	NA	NA	828200	1.81483e+06	1.32152e+06	0.5	4.6399e+06	0.5	3.51104	0.0233
P08514	ITGA2B	Integrin alpha-IIb OS=Homo sapiens OX=9606 GN=ITGA2B PE=1 SV=3	2	2	3	2	1	1039	113.3	5.38	4.46	2	0	NA	1.07392e+07	NA	NA	NA	893896	NA	NA	893896	0.25	1.07392e+07	0.25	12.0139	NA
A0A075B6J9	IGLV2-18	Immunoglobulin lambda variable 2-18 OS=Homo sapiens OX=9606 GN=IGLV2-18 PE=3 SV=2	11	1	2	1	1	118	12.4	4.82	4.41	1	0	NA	NA	NA	5.02271e+06	NA	1.27316e+06	NA	1.00969e+07	5.68501e+06	0.5	5.02271e+06	0.25	0.883501	NA
B3KUE5	PLTP	Phospholipid transfer protein, isoform CRA_c OS=Homo sapiens OX=9606 GN=PLTP PE=2 SV=1	4	2	2	2	1	513	56.6	6.64	4.33	2	0	NA	NA	9.20319e+06	4.6912e+06	NA	NA	NA	1.66305e+06	1.66305e+06	0.25	6.9472e+06	0.5	4.17739	NA
Q9HCN6	GP6	Platelet glycoprotein VI OS=Homo sapiens OX=9606 GN=GP6 PE=1 SV=4	4	1	3	1	1	339	36.8	9.2	3.97	1	0	NA	2.70678e+06	310207	703925	10391152	3.8692e+06	NA	86349.7	4.78223e+06	0.75	1.2403e+06	0.75	0.259357	0.316923
A0A024R8Y9	SELP	Selectin P (Granule membrane protein 140kDa, antigen CD62), isoform CRA_b OS=Homo sapiens OX=9606 GN=SELP PE=4 SV=1	1	1	3	1	1	830	90.8	6.6	3.71	1	0	NA	4.8622e+06	7.97524e+06	1.32189e+06	5.54278e+06	1.29575e+06	1.84116e+06	695826	2.34388e+06	1	4.71977e+06	0.75	2.01366	0.301441
P18206	VCL	Vinculin OS=Homo sapiens OX=9606 GN=VCL PE=1 SV=4	2	2	3	2	1	1134	123.7	5.66	3.43	2	0	NA	4.7793e+06	2.2987e+06	NA	1.83283e+06	1.25587e+06	NA	NA	1.54435e+06	0.5	3.539e+06	0.5	2.29158	0.257758
P37802	TAGLN2	Transgelin-2 OS=Homo sapiens OX=9606 GN=TAGLN2 PE=1 SV=3	10	2	3	2	1	199	22.4	8.25	3.18	2	0	NA	1.15098e+07	2.61643e+07	2.91102e+06	10904001	4.51088e+06	NA	1.1498e+06	5.52156e+06	0.75	1.35283e+07	0.75	2.4501	0.338173
P07307	ASGR2	Asialoglycoprotein receptor 2 OS=Homo sapiens OX=9606 GN=ASGR2 PE=1 SV=2	4	1	1	1	1	311	35.1	6.25	2.52	1	0	NA	NA	3.28358e+06	838203	2374051	NA	2.64991e+06	NA	2.51198e+06	0.5	2.06089e+06	0.5	0.820426	0.749066
P15291	B4GALT1	Beta-1,4-galactosyltransferase 1 OS=Homo sapiens OX=9606 GN=B4GALT1 PE=1 SV=5	2	1	1	1	1	398	43.9	8.65	2.13	1	0	NA	693654	796464	711462	1.03237e+06	NA	466546	NA	749459	0.5	733860	0.75	0.979186	0.946681
P01705	IGLV2-23	Immunoglobulin lambda variable 2-23 OS=Homo sapiens OX=9606 GN=IGLV2-23 PE=1 SV=2	7	1	1	1	1	113	11.9	5.91	1.99	1	0	NA	1.92069e+06	4.46885e+06	9.67125e+06	NA	NA	8.45983e+06	4.46606e+06	6.46295e+06	0.5	5.35359e+06	0.75	0.828352	0.758828
I4AY87	MIF	Epididymis secretory sperm binding protein (Fragment) OS=Homo sapiens OX=9606 GN=MIF PE=1 SV=1	8	1	1	1	1	115	12.5	7.88	1.99	1	0	NA	904926	1.35702e+06	NA	1.17187e+06	NA	NA	NA	1.17187e+06	0.25	1.13097e+06	0.5	0.965102	NA
B7ZLM6	XPNPEP2	X-prolyl aminopeptidase (Aminopeptidase P) 2, membrane-bound OS=Homo sapiens OX=9606 GN=XPNPEP2 PE=2 SV=1	1	1	1	1	1	674	75.6	6.04	1.98	1	0	NA	3.13507e+06	4.25177e+06	NA	2.09927e+06	2.07892e+06	NA	NA	2.08909e+06	0.5	3.69342e+06	0.5	1.76795	0.102814
K7ES00	H3F3B	Histone H3.3 (Fragment) OS=Homo sapiens OX=9606 GN=H3F3B PE=1 SV=1	6	1	1	1	1	151	16.6	11.84	1.71	1	0	NA	NA	3.33012e+07	9.66994e+06	13006418	NA	NA	NA	13006418	0.25	2.14856e+07	0.5	1.65192	NA
P13473	LAMP2	Lysosome-associated membrane glycoprotein 2 OS=Homo sapiens OX=9606 GN=LAMP2 PE=1 SV=2	2	1	3	1	1	410	44.9	5.63	1.61	1	0	NA	215560	725164	295930	715109	276648	582165	411232	496288	1	412218	0.75	0.830601	0.650227
Q8NCC5	SLC37A3	Sugar phosphate exchanger 3 OS=Homo sapiens OX=9606 GN=SLC37A3 PE=2 SV=2	1	1	1	1	1	494	54.5	5.66	0	1	0	NA	NA	NA	5.00776e+06	NA	5.05738e+06	NA	4.28848e+06	4.67293e+06	0.5	5.00776e+06	0.25	1.07165	NA
P41235	HNF4A	Hepatocyte nuclear factor 4-alpha OS=Homo sapiens OX=9606 GN=HNF4A PE=1 SV=3	2	1	1	1	1	474	52.8	7.43	0	1	0	NA	308038	608868	218112	NA	NA	NA	501948	501948	0.25	378339	0.75	0.753742	NA
Q13867	BLMH	Bleomycin hydrolase OS=Homo sapiens OX=9606 GN=BLMH PE=1 SV=1	2	1	1	1	1	455	52.5	6.27	0	1	0	NA	NA	293494	244225	471709	NA	NA	NA	471709	0.25	268859	0.5	0.569968	NA
Q7Z2Z1	TICRR	Treslin OS=Homo sapiens OX=9606 GN=TICRR PE=1 SV=2	1	1	5	1	1	1910	210.7	8.78	0	1	0	NA	NA	NA	9.163e+06	8935873	NA	NA	NA	8935873	0.25	9.163e+06	0.25	1.02542	NA
J7M2B1	EZR-ROS1	Tyrosine-protein kinase receptor OS=Homo sapiens OX=9606 GN=EZR-ROS1 PE=2 SV=1	1	1	2	1	1	858	98.9	6.13	0	1	0	NA	NA	680340	499642	771305	NA	NA	NA	771305	0.25	589991	0.5	0.764926	NA
